# Supplementary material for: Comprehensive Analysis of the 16p11.2 Deletion and Null Cntnap2 Mouse Models of Autism Spectrum Disorder
Source: PubMed Central journal article supplement (PMC4537259; doi:10.1371/journal.pone.0134572), 2015-08-14
Supplement: pone.0134572.s011.pdf [file pone.0134572.s011.pdf]

**S1 Methods. Genotyping of the 16p11.2 by PCR assay.**

Genotyping was done by Mouse Genotype (958 Sea Wind Court Carlsbad, CA 92011), based on protocols provided by the Jackson Lab (Figure\_S1, Table\_S1).

*Sep1* PCR assay:

| Sep1 -/- ~250 bp | Sep1 WT - 306 bp        |
|------------------|-------------------------|
| 12634:           | CAAGCACTGGCTATGCATGT    |
| 12635:           | AAGACAGAATGCTATGCAACCTT |
| 12636:           | GCTATGAAGATGCCACCAT     |
| 12637:           | GTGGTAACTCATGCGGTCCT    |
