# Supplementary material for: Comprehensive Analysis of the 16p11.2 Deletion and Null Cntnap2 Mouse Models of Autism Spectrum Disorder
Source: PubMed Central journal article supplement (PMC4537259; doi:10.1371/journal.pone.0134572), 2015-08-14
Supplement: pone.0134572.s012.pdf [file pone.0134572.s012.pdf]

**S2 Methods. Genotyping of the Cntnap2 Model by PCR assay.**

Genotyping was done by Mouse Genotype (958 Sea Wind Court Carlsbad, CA 92011), based on protocols provided by the Jackson Lab (Figure\_S2, Table\_S2).

Cntnap2 WT - 351 bp

13634 (Common): CTGCCAGCCCAGAACTGG

13635 (WT R): AGTTGATACCCGAGCGCC

Cntnap2 -/- - ~350 bp

13634 (Common): CTGCCAGCCCAGAACTGG

10791 (-/- R): CGCTTCCTCGTGCTTTACGGTAT
