# Supplementary material for: Comprehensive Analysis of the 16p11.2 Deletion and Null Cntnap2 Mouse Models of Autism Spectrum Disorder
Source: PubMed Central journal article supplement (PMC4537259; doi:10.1371/journal.pone.0134572), 2015-08-14
Supplement: pone.0134572.s013.pdf [file pone.0134572.s013.pdf]

**S3 Methods. Time-Course of Neonatal Tests.**

Most pups were generated in the first breeding round. As the first breeding did not generate the required 16 pups for the *Cntnap2* model, 3 WT and 3 *Cntnap2*<sup>-/-</sup> mice from the second cohort were also used for neonatal assessment (Table\_S3).
