# Supplementary material for: Comprehensive Analysis of the 16p11.2 Deletion and Null Cntnap2 Mouse Models of Autism Spectrum Disorder
Source: PubMed Central journal article supplement (PMC4537259; doi:10.1371/journal.pone.0134572), 2015-08-14
Supplement: pone.0134572.s015.pdf [file pone.0134572.s015.pdf]

**S1 Results. Breeding Efficacy, Gender, and Genotype Ratio.** Table S4 shows the number of litters and breeding efficacy of the two models. Sex and genotype ratios were unbiased in both models. Animals in cohort 1 were weaned at 4 weeks of age due to small body size. The second cohort was weaned at 3 weeks of age in preparation for P30 testing. Breeding success and pup survival was higher in the mixed genetic background (Table\_S4).
