# Supplementary material for: Comprehensive Analysis of the 16p11.2 Deletion and Null Cntnap2 Mouse Models of Autism Spectrum Disorder
Source: PubMed Central journal article supplement (PMC4537259; doi:10.1371/journal.pone.0134572), 2015-08-14
Supplement: pone.0134572.s016.pdf [file pone.0134572.s016.pdf]

**S1 Table. PCR conditions for the phenotyping of the 16p11.2 deletion model.**

| <b>Step</b> | <b>Temp</b> | <b>Time</b> | <b>Note</b>        |
|-------------|-------------|-------------|--------------------|
| 1           | 94°C        | 3 min       |                    |
| 2           | 94°C        | 30 sec      |                    |
| 3           | 58°C        | 30 sec      |                    |
| 4           | 72°C        | 40 sec      | Go to 2, 35 cycles |
| 5           | 72°C        | 2 min       |                    |
| 6           | 4°C         | Hold        |                    |
