# Supplementary material for: Comprehensive Analysis of the 16p11.2 Deletion and Null Cntnap2 Mouse Models of Autism Spectrum Disorder
Source: PubMed Central journal article supplement (PMC4537259; doi:10.1371/journal.pone.0134572), 2015-08-14
Supplement: pone.0134572.s017.pdf [file pone.0134572.s017.pdf]

**S2 Table. PCR conditions for the phenotyping of the Cntnap2 knockout model.**

| <i>Step</i> | <i>Temp</i> | <i>Time</i> | <i>Note</i>        |
|-------------|-------------|-------------|--------------------|
| 1           | 94°C        | 3 min       |                    |
| 2           | 94°C        | 30 sec      |                    |
| 3           | 58°C        | 30 sec      |                    |
| 4           | 72°C        | 40 sec      | Go to 2, 35 cycles |
| 5           | 72°C        | 2 min       |                    |
| 6           | 4°C         | Hold        |                    |
