# Supplementary material for: Comprehensive Analysis of the 16p11.2 Deletion and Null Cntnap2 Mouse Models of Autism Spectrum Disorder
Source: PubMed Central journal article supplement (PMC4537259; doi:10.1371/journal.pone.0134572), 2015-08-14
Supplement: pone.0134572.s018.pdf [file pone.0134572.s018.pdf]

**S3 Table. Postnatal day (P) of neonatal testing for both models.**

| Tests in Order        | P1-P3 | P4 | P7 | P13 | P15 |
|-----------------------|-------|----|----|-----|-----|
| Survival              | X     | X  | X  | X   | X   |
| Body Weight           |       | X  | X  |     | X   |
| Eye Opening           |       |    |    | X   |     |
| Milk Score Test       |       | X  | X  |     | X   |
| Body Temperature (T1) |       | X  | X  |     | X   |
| Maternal Isolation    |       | X  | X  |     | X   |
| Body Temperature (T2) |       | X  | X  |     | X   |
| Geotaxis              |       | X  | X  |     | X   |
| Righting Reflex       |       | X  | X  |     | X   |
