# Supplementary material for: Comprehensive Analysis of the 16p11.2 Deletion and Null Cntnap2 Mouse Models of Autism Spectrum Disorder
Source: PubMed Central journal article supplement (PMC4537259; doi:10.1371/journal.pone.0134572), 2015-08-14
Supplement: pone.0134572.s019.pdf [file pone.0134572.s019.pdf]

**S4 Table. Number of litters, pups, gender and genotype ratios, and survival up to weaning day.**

|                                     | <b>16p11.2</b>  |     | <b>Cntnap2</b> |     |
|-------------------------------------|-----------------|-----|----------------|-----|
|                                     | 1               | 2   | 1              | 2   |
| <b>Cohort Number</b>                | 1               | 2   | 1              | 2   |
| <b>Days Mated</b>                   | 3               | 5-6 | 3              | 5-6 |
| <b>Number of breeding pairs</b>     | 40              | 40  | 40             | 40  |
| <b>Number of litters</b>            | 24              | 38  | 21             | 34  |
| <b>Number of pups</b>               | 183             | 335 | 130            | 251 |
| <b>Number of males (M)</b>          | 87              | 170 | 62             | 119 |
| <b>Number of females (F)</b>        | 96              | 165 | 68             | 132 |
| <b>Breeding yield (pups/litter)</b> | 8.4             |     | 6.9            |     |
| <b>Ratio M:F</b>                    | 0.98 (NS)       |     | 0.91 (NS)      |     |
| <b>Ratio WT:df/+ or WT:-/-</b>      | 1:0.8 (p< 0.09) |     | 1:2.3:1.3 (NS) |     |
| <b>Percent deaths</b>               | 2.1%            |     | 7.9%           |     |

NS, non-significant.
