# Supplementary material for: Comprehensive Analysis of the 16p11.2 Deletion and Null Cntnap2 Mouse Models of Autism Spectrum Disorder
Source: PubMed Central journal article supplement (PMC4537259; doi:10.1371/journal.pone.0134572), 2015-08-14
Supplement: pone.0134572.s020.pdf [file pone.0134572.s020.pdf]

S5 Table. SmartCube results for the 16p11.2 deletion model.

| 16p11.2   |                         |                                       |          |       |      |
|-----------|-------------------------|---------------------------------------|----------|-------|------|
| SmartCube | Measure                 |                                       | Genotype | Mean  | SE   |
|           | Repetitive Behavior     | Grooming Time                         | WT       | 392.6 | 54.6 |
|           |                         |                                       | HET      | 350.8 | 49.7 |
|           |                         | Digging Time (s)                      | WT       | 0.3   | 0.03 |
|           |                         |                                       | HET      | 0.2   | 0.04 |
|           | Exploration             | Latency to Approach Aversive Stimulus | WT       | 280.5 | 65.9 |
|           |                         |                                       | HET      | 92.4  | 33.1 |
|           |                         | Sniffing (frequency)                  | WT       | 258.3 | 23.7 |
|           |                         |                                       | HET      | 278.1 | 22.4 |
|           |                         | Unsupported Rearing Time (s)          | WT       | 73.7  | 16.1 |
|           |                         |                                       | HET      | 72.1  | 16.5 |
|           | Activity                | Freezing Time (s)                     | WT       | 6.2   | 2.1  |
|           |                         |                                       | HET      | 3.7   | 0.8  |
|           |                         | Abrupt Movement Frequency             | WT       | 7.4   | 2.5  |
|           |                         |                                       | HET      | 12.4  | 5.2  |
|           |                         | Velocity                              | WT       | 2.4   | 0.1  |
|           |                         |                                       | HET      | 2.7   | 0.2  |
|           |                         | Locomotion Bursts (frequency)         | WT       | 78.5  | 13.4 |
|           |                         |                                       | HET      | 118.0 | 26.4 |
|           | Short Steps (frequency) | WT                                    | 20.3     | 2.2   |      |
| HET       |                         | 26.6                                  | 2.6      |       |      |
