# Supplementary material for: Comprehensive Analysis of the 16p11.2 Deletion and Null Cntnap2 Mouse Models of Autism Spectrum Disorder
Source: PubMed Central journal article supplement (PMC4537259; doi:10.1371/journal.pone.0134572), 2015-08-14
Supplement: pone.0134572.s021.pdf [file pone.0134572.s021.pdf]

S6 Table. SmartCube results for the Cntnap2 knockout model.

| Cntnap2   |                         |                                       |          |       |      |
|-----------|-------------------------|---------------------------------------|----------|-------|------|
| SmartCube | Measure                 |                                       | Genotype | Mean  | SE   |
|           | Repetitive Behavior     | Grooming Time                         | WT       | 193.9 | 21.6 |
|           |                         |                                       | KO       | 185.6 | 20.1 |
|           |                         | Digging Time (s)                      | WT       | 0.3   | 0.04 |
|           |                         |                                       | KO       | 0.2   | 0.03 |
|           | Exploration             | Latency to Approach Aversive Stimulus | WT       | 36.0  | 7.4  |
|           |                         |                                       | KO       | 13.5  | 2.8  |
|           |                         | Sniffing (frequency)                  | WT       | 446.9 | 29.3 |
|           |                         |                                       | KO       | 396.1 | 25.4 |
|           |                         | Unsupported Rearing Time (s)          | WT       | 72.5  | 7.1  |
|           |                         |                                       | KO       | 65.2  | 9.1  |
|           | Activity                | Freezing Time (s)                     | WT       | 1.8   | 0.3  |
|           |                         |                                       | KO       | 0.4   | 0.1  |
|           |                         | Abrupt Movement Frequency             | WT       | 6.8   | 1.3  |
|           |                         |                                       | KO       | 30.7  | 5.4  |
|           |                         | Velocity                              | WT       | 3.3   | 0.1  |
|           |                         |                                       | KO       | 3.8   | 0.1  |
|           |                         | Locomotion Bursts (frequency)         | WT       | 236.6 | 14.9 |
|           |                         |                                       | KO       | 358.5 | 21.7 |
|           | Short Steps (frequency) | WT                                    | 42.4     | 3.4   |      |
| KO        |                         | 62.8                                  | 2.9      |       |      |
