# Supplementary material for: Comprehensive Analysis of the 16p11.2 Deletion and Null Cntnap2 Mouse Models of Autism Spectrum Disorder
Source: PubMed Central journal article supplement (PMC4537259; doi:10.1371/journal.pone.0134572), 2015-08-14
Supplement: pone.0134572.s022.pdf [file pone.0134572.s022.pdf]

S7 Table. NeuroCube results for the 16p11.2 deletion model.

| 16p11.2                |                       | Genotype | P30   |       | P60   |      |
|------------------------|-----------------------|----------|-------|-------|-------|------|
|                        |                       |          | Mean  | SE    | Mean  | SE   |
| Length and Width       | Stride Length (mm)    | WT       | 63.7  | 1.5   | 68.5  | 1.3  |
|                        |                       | HET      | 60.3  | 2.3   | 69.3  | 2.3  |
|                        | Front Base (mm)       | WT       | 16.3  | 0.3   | 17.3  | 0.4  |
|                        |                       | HET      | 16.0  | 0.4   | 16.3  | 0.3  |
|                        | Hind Base (mm)        | WT       | 24.3  | 0.3   | 23.8  | 0.6  |
|                        |                       | HET      | 26.7  | 0.6   | 25.0  | 0.5  |
| Movement               | Speed                 | WT       | 199.2 | 16.8  | 201.6 | 16.6 |
|                        |                       | HET      | 205.3 | 18.4  | 262.5 | 20.3 |
|                        | Stride Duration       | WT       | 375.8 | 24.9  | 391.7 | 24.0 |
|                        |                       | HET      | 356.7 | 28.8  | 319.4 | 15.2 |
|                        | Stance Duration       | WT       | 164.7 | 11.2  | 176.4 | 14.2 |
|                        |                       | HET      | 152.1 | 15.9  | 135.4 | 9.9  |
| Swing Percent          | WT                    | 55.7     | 1.2   | 54.9  | 1.4   |      |
|                        | HET                   | 57.7     | 1.4   | 57.7  | 1.4   |      |
| Paw Measurements       | Front Paw Area        | WT       | 211.4 | 3.3   | 214.4 | 3.8  |
|                        |                       | HET      | 188.9 | 3.7   | 188.8 | 4.3  |
|                        | Hind Paw Area         | WT       | 150.3 | 5.1   | 178.6 | 5.9  |
|                        |                       | HET      | 140.5 | 2.3   | 155.7 | 7.5  |
|                        | Front Paw Intensity   | WT       | 80.9  | 2.5   | 84.4  | 1.9  |
|                        |                       | HET      | 80.3  | 2.7   | 84.6  | 1.7  |
| Hind Paw Intensity     | WT                    | 100.7    | 2.6   | 101.7 | 2.8   |      |
|                        | HET                   | 87.2     | 2.7   | 98.6  | 2.2   |      |
| Weight & Bias          | Body Weight           | WT       | 21.1  | 0.4   | 26.0  | 0.4  |
|                        |                       | HET      | 17.2  | 0.5   | 22.2  | 0.6  |
|                        | Hind Weight Bias      | WT       | 1.2   | 0.02  | 1.2   | 0.02 |
|                        |                       | HET      | 1.1   | 0.03  | 1.2   | 0.03 |
|                        | Left Hind Weight Bias | WT       | 1.1   | 0.03  | 1.1   | 0.02 |
|                        |                       | HET      | 1.0   | 0.02  | 1.1   | 0.03 |
| Left Front Weight Bias | WT                    | 1.0      | 0.01  | 1.0   | 0.01  |      |
|                        | HET                   | 1.0      | 0.02  | 1.0   | 0.01  |      |
