# Supplementary material for: Comprehensive Analysis of the 16p11.2 Deletion and Null Cntnap2 Mouse Models of Autism Spectrum Disorder
Source: PubMed Central journal article supplement (PMC4537259; doi:10.1371/journal.pone.0134572), 2015-08-14
Supplement: pone.0134572.s024.pdf [file pone.0134572.s024.pdf]

S9 Table. General health data for the 16p11.2 deletion model.

| 16p11.2            |                   |          |               |      |              |      |      |      |     |          |                |                |        |        |
|--------------------|-------------------|----------|---------------|------|--------------|------|------|------|-----|----------|----------------|----------------|--------|--------|
| Health/General     | Measure           | Genotype | Mean          | SE   | Mean         | SE   | Mean | SE   | n   | Factor   |                |                |        |        |
|                    |                   |          |               |      |              |      |      |      |     | Genotype | Age            | Genotype x Age |        |        |
|                    | Body Weight       |          |               | P4   |              | P7   |      | P15  |     |          |                |                |        |        |
|                    |                   | WT       |               | 3.5  | 0.1          | 5.2  | 0.1  | 9.1  | 0.1 | 16       | F <sup>1</sup> | 33.0           | 1009.8 | 14.9   |
|                    |                   | HET      |               | 2.9  | 0.1          | 4.4  | 0.2  | 7.4  | 0.2 | 16       | p              | 0.0001         | 0.0001 | 0.0001 |
|                    |                   |          |               | P30  |              | P60  |      | P90  |     |          |                |                |        |        |
|                    |                   | WT       |               | 20.4 | 0.3          | 26.3 | 0.4  | 30.0 | 0.5 | 32       | F <sup>1</sup> | 48.7           | 758.8  | 3.8    |
|                    | HET               |          | 17.4          | 0.3  | 23.1         | 0.4  | 25.9 | 0.5  | 32  | p        | 0.0001         | 0.0001         | 0.03   |        |
|                    | Basal Temperature |          |               | P4   |              | P7   |      | P15  |     |          |                |                |        |        |
|                    |                   | WT       |               | 35.5 | 0.1          | 35.4 | 0.1  | 36.1 | 0.1 | 16       | F              | 0.6            | 31.5   | 1.7    |
| HET                |                   | 35.3     | 0.1           | 35.6 | 0.1          | 36.3 | 0.2  | 16   | p   | ns       | 0.0001         | ns             |        |        |
| Delta Temperature  |                   |          | P4            |      | P7           |      | P15  |      |     |          |                |                |        |        |
|                    | WT                |          | 3.2           | 0.3  | 2.4          | 0.1  | 0.1  | 0.1  | 16  | F        | 1.1            | 166.5          | 0.7    |        |
| HET                |                   | 3.1      | 0.2           | 2.6  | 0.1          | 0.4  | 0.2  | 16   | p   | ns       | 0.0001         | ns             |        |        |
| Milk               |                   |          | P4            |      | P7           |      | P15  |      |     |          |                |                |        |        |
|                    | WT                |          | 100.0         |      | 68.8         |      | -    |      | 16  | 16       | 16             | Test           | P4     | P7     |
| HET                |                   | 75.0     |               | 68.8 |              | -    |      | 16   | 16  | 16       | p              | 0.03           | -      | -      |
| Eye Opened P13 (%) |                   |          | P13 Right eye |      | P13 Left eye |      |      |      | n   |          |                |                |        |        |
|                    | WT                |          | 93.8          |      | 93.8         |      |      |      | 16  |          |                |                |        |        |
| HET                |                   | 93.8     |               | 87.5 |              |      |      | 16   |     |          |                |                |        |        |

Notes:<sup>1</sup>Post-hoc comparisons significant for the three ages
