# Supplementary material for: Comprehensive Analysis of the 16p11.2 Deletion and Null Cntnap2 Mouse Models of Autism Spectrum Disorder
Source: PubMed Central journal article supplement (PMC4537259; doi:10.1371/journal.pone.0134572), 2015-08-14
Supplement: pone.0134572.s025.pdf [file pone.0134572.s025.pdf]

S10 Table. General health for the Cntnap2 knockout model.

| Cntnap2            |                   |          |      |      |           |      |      |          |        |          |                |                |        |     |     |
|--------------------|-------------------|----------|------|------|-----------|------|------|----------|--------|----------|----------------|----------------|--------|-----|-----|
| Health/General     | Measure           | Genotype | Mean | SE   | Mean      | SE   | Mean | SE       | n      | Factor   |                |                |        |     |     |
|                    |                   |          |      |      |           |      |      |          |        | Genotype | Age            | Genotype x Age |        |     |     |
|                    | Body Weight       |          |      | P4   |           | P7   |      | P15      |        |          |                |                |        |     |     |
|                    |                   | WT       |      | 2.1  | 0.1       | 3.5  | 0.2  | 6.5      | 0.3    | 22       | F              | 0.6            | 921.2  | 0.2 |     |
|                    |                   | KO       |      | 2.2  | 0.1       | 3.7  | 0.1  | 6.7      | 0.2    | 22       | p              | ns             | 0.0001 | ns  |     |
|                    |                   |          |      | P30  |           | P60  |      | P90      |        |          |                |                |        |     |     |
|                    |                   | WT       |      | 15.0 | 0.5       | 23.1 | 0.4  | 26.1     | 0.4    | 29       | F              | 1.8            | 1254.1 | 7.6 |     |
|                    | KO                |          | 15.1 | 0.4  | 22.4      | 0.3  | 24.6 | 0.3      | 28     | p        | ns             | 0.0001         | 0.001  |     |     |
|                    | Basal Temperature |          |      | P4   |           | P7   |      | P15      |        |          |                |                |        |     |     |
|                    |                   | WT       |      | 35.2 | 0.1       | 35.3 | 0.2  | 36.1     | 0.1    | 22       | F              | 0.1            | 32.0   | 0.4 |     |
| KO                 |                   | 35.2     | 0.1  | 35.4 | 0.2       | 36.1 | 0.1  | 22       | p      | ns       | 0.0001         | ns             |        |     |     |
| Delta Temperature  | WT                |          | 3.5  | 0.1  | 3.4       | 0.2  | 1.1  | 0.1      | 22     | F        | 0.1            | 200.5          | 1.7    |     |     |
|                    | KO                |          | 3.6  | 0.2  | 3.4       | 0.2  | 0.8  | 0.1      | 22     | p        | ns             | 0.0001         | ns     |     |     |
| Milk               |                   |          |      |      |           |      |      |          | P4 (n) | P7 (n)   | P15 (n)        | Test           | P4     | P7  | P15 |
|                    | WT                |          | 86.4 |      | 72.7      |      | -    |          |        |          |                | Chi            | 0.003  | 1.9 | -   |
| KO                 |                   | 87.0     |      | 65.2 |           | -    |      |          |        |          | p <sup>1</sup> | ns             | ns     | -   |     |
| Eye Opened P13 (%) |                   |          | P13  |      | Right eye | P13  |      | Left eye | n      |          |                |                |        |     |     |
|                    | WT                |          | 15.9 |      |           | 11.4 |      |          | 22     |          |                |                |        |     |     |
| KO                 |                   | 19.5     |      |      | 20.5      |      |      | 22       |        |          |                |                |        |     |     |

Notes: <sup>1</sup>Fisher exact p-value
