# Supplementary material for: Comprehensive Analysis of the 16p11.2 Deletion and Null Cntnap2 Mouse Models of Autism Spectrum Disorder
Source: PubMed Central journal article supplement (PMC4537259; doi:10.1371/journal.pone.0134572), 2015-08-14
Supplement: pone.0134572.s026.pdf [file pone.0134572.s026.pdf]

S11 Table. Activity and ultrasonic vocalizations in the 16p11.2 deletion model.

| 16p11.2  |                         |          |      |      |      |       |      |      |      |          |        |                |        |     |
|----------|-------------------------|----------|------|------|------|-------|------|------|------|----------|--------|----------------|--------|-----|
|          | Measure                 | Genotype | P4   |      | P7   |       | P15  |      | n    | Factor   |        |                |        |     |
|          |                         |          | Mean | SE   | Mean | SE    | Mean | SE   |      | Genotype | Age    | Genotype x Age |        |     |
| Activity | Square Crossing         | WT       | 1.8  | 0.6  | 5.9  | 0.8   | 21.4 | 5.6  | 16   | F        | 1.4    | 19.6           | 1.0    |     |
|          |                         | HET      | 0.9  | 0.4  | 5.9  | 2.0   | 14.3 | 2.9  | 16   | p        | ns     | 0.0001         | ns     |     |
|          | Pivot                   | WT       | 2.6  | 0.6  | 1.6  | 0.6   | 0.3  | 0.2  | 16   | F        | 0.7    | 8.3            | 0.8    |     |
|          |                         | HET      | 2.3  | 0.7  | 0.6  | 0.3   | 0.6  | 0.2  | 16   | p        | ns     | 0.001          | ns     |     |
|          | Rear                    | WT       | 0.1  | 0.1  | 0.0  | 0.0   | 3.2  | 0.9  | 16   | F        | 0.0001 | P15 only       | -      |     |
|          |                         | HET      | 0.1  | 0.1  | 0.0  | 0.0   | 3.2  | 0.8  | 16   | p        | ns     | -              | -      |     |
|          | Groom                   | WT       | 0.0  | 0.0  | 0.0  | 0.0   | 1.3  | 0.3  | 16   | F        | 2.1    | P15 only       | -      |     |
|          |                         | HET      | 0.0  | 0.0  | 0.0  | 0.0   | 0.8  | 0.3  | 16   | p        | ns     | -              | -      |     |
|          |                         |          |      |      |      |       |      |      |      |          |        |                |        |     |
|          | Ultrasonic Vocalization |          | WT   | 64.3 | 13.2 | 142.1 | 18.8 | 4.7  | 2.2  | 16       | F      | 0.0004         | 29.9   | 2.1 |
|          |                         |          | HET  | 81.0 | 17.7 | 108.4 | 21.5 | 22.5 | 11.2 | 16       | p      | ns             | 0.0001 | ns  |
