# Supplementary material for: Comprehensive Analysis of the 16p11.2 Deletion and Null Cntnap2 Mouse Models of Autism Spectrum Disorder
Source: PubMed Central journal article supplement (PMC4537259; doi:10.1371/journal.pone.0134572), 2015-08-14
Supplement: pone.0134572.s027.pdf [file pone.0134572.s027.pdf]

S12 Table. Activity and ultrasonic vocalizations in the Cntnap2 knockout model.

| Cntnap2  |                         |          |      |     |      |      |      |      |      |          |     |                |      |     |
|----------|-------------------------|----------|------|-----|------|------|------|------|------|----------|-----|----------------|------|-----|
|          | Measure                 | Genotype | P4   |     | P7   |      | P15  |      | n    | Factor   |     |                |      |     |
|          |                         |          | Mean | SE  | Mean | SE   | Mean | SE   |      | Genotype | Age | Genotype x Age |      |     |
| Activity | Square Crossing         | WT       | 0.0  | 0.0 | 1.6  | 0.7  | 10.8 | 3.4  | 22   | F        | 0.4 | 18.6           | 0.1  |     |
|          |                         | KO       | 0.2  | 0.1 | 2.9  | 0.8  | 12.2 | 3.3  | 22   | p        | ns  | 0.0001         | ns   |     |
|          | Pivot                   | WT       | 0.3  | 0.1 | 0.3  | 0.2  | 1.2  | 0.4  | 22   | F        | 2.7 | 10.1           | 0.6  |     |
|          |                         | KO       | 0.6  | 0.4 | 0.5  | 0.2  | 2.0  | 0.4  | 22   | p        | ns  | 0.0001         | ns   |     |
|          | Rear                    | WT       | 0.0  | 0.0 | 0.0  | 0.0  | 0.9  | 0.3  | 22   | F        | 0.5 | P15 only       | -    |     |
|          |                         | KO       | 0.0  | 0.0 | 0.0  | 0.0  | 1.2  | 0.3  | 22   | p        | ns  | -              | -    |     |
|          | Groom                   | WT       | 0.0  | 0.0 | 0.0  | 0.0  | 1.2  | 0.2  | 22   | F        | 1.2 | P15 only       | -    |     |
|          |                         | KO       | 0.0  | 0.0 | 0.0  | 0.0  | 0.9  | 0.2  | 22   | p        | ns  | -              | -    |     |
|          |                         |          |      |     |      |      |      |      |      |          |     |                |      |     |
|          | Ultrasonic Vocalization |          | WT   | 6.0 | 1.8  | 7.3  | 2.4  | 23.9 | 8.8  | 22       | F   | 1.1            | 5.0  | 1.5 |
|          |                         |          | KO   | 1.5 | 0.5  | 26.3 | 10.0 | 27.5 | 10.5 | 22       | p   | ns             | 0.01 | ns  |
