# Supplementary material for: Comprehensive Analysis of the 16p11.2 Deletion and Null Cntnap2 Mouse Models of Autism Spectrum Disorder
Source: PubMed Central journal article supplement (PMC4537259; doi:10.1371/journal.pone.0134572), 2015-08-14
Supplement: pone.0134572.s028.pdf [file pone.0134572.s028.pdf]

S13 Table. Motor coordination and reflexes in the 16p11.2 deletion model.

| 16p11.2                     |                       |                        |      |      |      |      |      |      |      |          |        |                |                |       |       |       |     |
|-----------------------------|-----------------------|------------------------|------|------|------|------|------|------|------|----------|--------|----------------|----------------|-------|-------|-------|-----|
|                             | Measure               | Genotype               | P4   |      | P7   |      | P15  |      | n    | Factor   |        |                |                |       |       |       |     |
|                             |                       |                        | Mean | SE   | Mean | SE   | Mean | SE   |      | Genotype | Age    | Genotype x Age |                |       |       |       |     |
| Motor Coordination/Reflexes | Roll (Isolation Test) | WT                     | 0.7  | 0.4  | 0.0  | 0.0  | 0.0  | 0.0  | 16   | F        | 0.1    | P4 only        | -              |       |       |       |     |
|                             |                       | HET                    | 0.6  | 0.2  | 0.0  | 0.0  | 0.0  | 0.0  | 16   | p        | ns     | -              | -              |       |       |       |     |
|                             | Righting              | Righting Latency       | WT   | 3.3  | 0.3  | 2.5  | 0.2  | 1.0  | 0.03 | 16       | F      | 6.9            | 39.2           | 3.6   |       |       |     |
|                             |                       |                        | HET  | 5.3  | 0.7  | 3.5  | 0.6  | 1.0  | 0.04 | 16       | p      | 0.01           | 0.0001         | 0.03  |       |       |     |
|                             |                       | Righting (#)           | WT   | 2.9  | 0.1  | 3.0  | 0.0  | 3.0  | 0.0  | 16       | P4 (n) | P7 (n)         | P15 (n)        | Test  | P4    | P7    | P15 |
|                             |                       |                        | HET  | 2.4  | 0.2  | 2.9  | 0.1  | 3.0  | 0.0  | 16       | 16     | 16             | 16             | U     | 78.0  | 120.0 | -   |
|                             | Geotaxis              | Geotaxis fall (%)      | WT   | 12.5 |      | 0.0  |      | 12.5 |      | 16       | 16     | 16             | U              | 113.0 | 120.0 | 120.0 |     |
|                             |                       |                        | HET  | 18.8 |      | 3.1  |      | 6.3  |      | 16       | 16     | 16             | p <sup>1</sup> | ns    | ns    | ns    |     |
|                             |                       | Geotaxis turns (%)     | WT   | 43.8 |      | 56.3 |      | 18.8 |      | 16       | 16     | 16             | U              | 101.0 | 83.5  | 123.0 |     |
|                             |                       |                        | HET  | 25.0 |      | 21.9 |      | 21.9 |      | 16       | 16     | 16             | p <sup>1</sup> | ns    | ns    | ns    |     |
|                             |                       | Geotaxis walk down (%) | WT   | 0.0  |      | 0.0  |      | 68.8 |      | 16       | 16     | 16             | U              | -     | -     | 125.0 |     |
|                             |                       |                        | HET  | 0.0  |      | 0.0  |      | 75.0 |      | 16       | 16     | 16             | p <sup>1</sup> | -     | -     | ns    |     |
|                             |                       | Latency to Fall        | WT   | 29.3 | 13.9 | -    | -    | 5.7  | 0.3  | 3        | 0      | 2              | F              | 0.1   | -     | -     |     |
|                             |                       |                        | HET  | 32.5 | 4.5  | 5.0  | -    | 2.0  | -    | 5        | 1      | 1              | p              | ns    | -     | -     |     |
| Latency to Success          |                       | WT                     | 34.8 | 7.7  | 44.0 | 5.8  | 19.0 | 8.2  | 8    | 9        | 3      | F              | 4.2            | 0.1   | -     |       |     |
|                             |                       | HET                    | 56.0 | 4.0  | 47.3 | 7.4  | 9.0  | 4.9  | 5    | 4        | 4      | p              | ns             | ns    | -     |       |     |

Notes: Statistics were not performed if the observed number of subjects in a group was smaller than 3. <sup>1</sup>Mann-Whitney tied p-value
