# Supplementary material for: Comprehensive Analysis of the 16p11.2 Deletion and Null Cntnap2 Mouse Models of Autism Spectrum Disorder
Source: PubMed Central journal article supplement (PMC4537259; doi:10.1371/journal.pone.0134572), 2015-08-14
Supplement: pone.0134572.s029.pdf [file pone.0134572.s029.pdf]

S14 Table. Motor coordination and reflexes in the Cntnap2 knockout model.

| Cntnap2                     |                       |                        |      |      |      |      |      |      |     |          |        |                |                |       |       |       |
|-----------------------------|-----------------------|------------------------|------|------|------|------|------|------|-----|----------|--------|----------------|----------------|-------|-------|-------|
|                             | Measure               | Genotype               | P4   |      | P7   |      | P15  |      | n   | Factor   |        |                |                |       |       |       |
|                             |                       |                        | Mean | SE   | Mean | SE   | Mean | SE   |     | Genotype | Age    | Genotype x Age |                |       |       |       |
| Motor Coordination/Reflexes | Roll (Isolation Test) | WT                     | 2.1  | 0.5  | 0.1  | 0.1  | 0.0  | 0.0  | 22  | F        | 4.1    | P4 only        | -              |       |       |       |
|                             |                       | KO                     | 3.9  | 0.7  | 0.1  | 0.1  | 0.0  | 0.0  | 23  | p        | 0.0497 | -              | -              |       |       |       |
|                             | Righting              | Righting Latency       | WT   | 6.6  | 0.6  | 6.8  | 0.9  | 1.6  | 0.0 | 16       | F      | 0.8            | 43.0           | 3.9   |       |       |
|                             |                       |                        | KO   | 6.4  | 0.7  | 4.6  | 0.4  | 2.2  | 0.5 | 18       | p      | ns             | 0.0001         | 0.03  |       |       |
|                             |                       | Righting (#)           | WT   | 1.4  | 0.2  | 2.3  | 0.2  | 2.9  | 0.1 | 22       | 22     | 22             | U              | 235.0 | 162.0 | 231.0 |
|                             |                       |                        | KO   | 1.3  | 0.2  | 1.7  | 0.2  | 3.0  | 0.5 | 23       | 23     | 22             | p <sup>1</sup> | ns    | 0.03  | ns    |
|                             | Geotaxis              | Geotaxis fall (%)      | WT   | 25.0 |      | 11.4 |      | 4.5  |     | 22       | 22     | 22             | U              | 233.0 | 204.0 | 231.0 |
|                             |                       |                        | KO   | 30.4 |      | 21.7 |      | 0.0  |     | 23       | 23     | 22             | p <sup>1</sup> | ns    | ns    | ns    |
|                             |                       | Geotaxis turns (%)     | WT   | 6.8  |      | 9.1  |      | 72.7 |     | 22       | 22     | 22             | U              | 231.0 | 244.0 | 196.0 |
|                             |                       |                        | KO   | 15.2 |      | 10.9 |      | 56.8 |     | 23       | 23     | 22             | p <sup>1</sup> | ns    | ns    | ns    |
|                             |                       | Geotaxis walk down (%) | WT   | 0.0  |      | 0.0  |      | 13.6 |     | 22       | 22     | 22             | U              | -     | -     | 158.0 |
|                             |                       |                        | KO   | 0.0  |      | 2.2  |      | 43.2 |     | 23       | 23     | 22             | p <sup>1</sup> | -     | -     | 0.02  |
|                             |                       | Latency to Fall        | WT   | 25.8 | 6.8  | 30.8 | 14.0 | 53.0 | -   | 9        | 3      | 1              | F              | 0.01  | 0.4   | -     |
|                             |                       |                        | KO   | 27.0 | 6.7  | 22.4 | 6.1  | -    | -   | 10       | 8      | 0              | p              | ns    | ns    | -     |
| Latency to Success          | WT                    | 34.0                   | 26.0 | 60.0 | 0.0  | 25.6 | 4.4  | 2    | 2   | 16       | F      | -              | -              | 1.2   |       |       |
|                             | KO                    | 49.5                   | 10.5 | 37.7 | 15.1 | 18.4 | 5.0  | 4    | 3   | 14       | p      | -              | -              | ns    |       |       |

Notes: Statistics were not performed if the observed number of subjects in a group was smaller than 3. <sup>1</sup>Mann-Whitney tied p-value
