# Supplementary material for: Comprehensive Analysis of the 16p11.2 Deletion and Null Cntnap2 Mouse Models of Autism Spectrum Disorder
Source: PubMed Central journal article supplement (PMC4537259; doi:10.1371/journal.pone.0134572), 2015-08-14
Supplement: pone.0134572.s030.pdf [file pone.0134572.s030.pdf]

S15 Table. 3-chamber test for the 16p11.2 deletion model.

| 16p11.2                    |                             |          |         |       |          |          |          |                     |          |                     |     |
|----------------------------|-----------------------------|----------|---------|-------|----------|----------|----------|---------------------|----------|---------------------|-----|
| 3-Chamber                  | Measure                     | Genotype | Mean SE |       | Mean SE  |          | n        | Factor              |          |                     |     |
|                            |                             |          | Left    | Right | Genotype | Stimulus |          | Genotype x Stimulus |          |                     |     |
|                            | Baseline % Time in Chambers | WT       | 21.8    | 3.1   | 31.5     | 3.8      | 16       | F                   | 2.7      | 8.4                 | 0.2 |
|                            |                             | HET      | 28.3    | 1.9   | 35.6     | 3.2      | 16       | p                   | ns       | 0.01                | ns  |
|                            |                             |          | Mouse   |       | Object   |          |          |                     |          |                     |     |
|                            | % Time in Chamber           | WT       | 55.9    | 5.0   | 30.7     | 3.5      | 16       | F                   | 0.8      | 24.6                | 0.7 |
|                            |                             | HET      | 59.1    | 3.9   | 29.8     | 3.3      | 16       | p                   | ns       | 0.0001              | ns  |
|                            | % Time Sniffing             | WT       | 24.0    | 2.5   | 8.0      | 1.3      | 16       | F                   | 0.001    | 53.9                | 0.1 |
|                            |                             | HET      | 24.8    | 2.2   | 7.3      | 1.0      | 16       | p                   | ns       | 0.0001              | ns  |
|                            | Entries to Chamber          | WT       | 19.7    | 7.4   | 11.4     | 1.2      | 16       | F                   | 0.4      | 3.0                 | 0.2 |
| HET                        |                             | 15.4     | 2.1     | 10.8  | 1.0      | 16       | p        | ns                  | ns       | ns                  |     |
|                            |                             | Mean SE  |         | SE    |          |          | Genotype |                     |          |                     |     |
| Mouse Preference Time (%)  | WT                          | 63.0     |         | 5.3   |          | 16       | F        |                     | 0.3      |                     |     |
|                            | HET                         | 66.1     |         | 3.9   |          | 16       | p        |                     | ns       |                     |     |
| Mouse Sniffing (%)         | WT                          | 72.3     |         | 5.9   |          | 16       | F        |                     | 0.3      |                     |     |
|                            | HET                         | 76.1     |         | 3.4   |          | 16       | p        |                     | ns       |                     |     |
|                            |                             |          | Novel   |       | Familiar |          | n        | Genotype            | Stimulus | Genotype x Stimulus |     |
| % Time in Chamber          | WT                          | 51.3     | 2.8     | 36.4  | 2.6      | 16       | F        | 0.3                 | 15.3     | 0.3                 |     |
|                            | HET                         | 49.9     | 2.1     | 38.7  | 2.2      | 16       | p        | ns                  | 0.001    | ns                  |     |
| % Time Sniffing            | WT                          | 16.2     | 1.8     | 9.2   | 1.0      | 16       | F        | 0.4                 | 20.9     | 0.1                 |     |
|                            | HET                         | 14.9     | 1.3     | 9.0   | 0.8      | 16       | p        | ns                  | 0.0001   | ns                  |     |
| Entries into Chamber       | WT                          | 30.1     | 9.4     | 28.4  | 12.2     | 16       | F        | 0.3                 | 0.2      | 1.4                 |     |
|                            | HET                         | 21.4     | 3.7     | 25.0  | 3.5      | 16       | p        | ns                  | ns       | ns                  |     |
|                            |                             | Mean SE  |         | SE    |          |          | Genotype |                     |          |                     |     |
| Novel Mouse Preference (%) | WT                          | 58.5     |         | 2.9   |          | 16       | F        |                     | 0.3      |                     |     |
|                            | HET                         | 56.4     |         | 2.3   |          | 16       | p        |                     | ns       |                     |     |
| Novel Mouse Sniffing (%)   | WT                          | 62.7     |         | 3.7   |          | 16       | F        |                     | 0.04     |                     |     |
|                            | HET                         | 61.7     |         | 3.2   |          | 16       | p        |                     | ns       |                     |     |
