# Supplementary material for: Comprehensive Analysis of the 16p11.2 Deletion and Null Cntnap2 Mouse Models of Autism Spectrum Disorder
Source: PubMed Central journal article supplement (PMC4537259; doi:10.1371/journal.pone.0134572), 2015-08-14
Supplement: pone.0134572.s031.pdf [file pone.0134572.s031.pdf]

S16 Table. 3-chamber test for the Cntnap2 knockout model.

| Cntnap2                    |                             |          |         |       |          |          |          |                     |          |                     |     |
|----------------------------|-----------------------------|----------|---------|-------|----------|----------|----------|---------------------|----------|---------------------|-----|
| 3-Chamber                  | Measure                     | Genotype | Mean SE |       | Mean SE  |          | n        | Factor              |          |                     |     |
|                            |                             |          | Left    | Right | Genotype | Stimulus |          | Genotype x Stimulus |          |                     |     |
|                            | Baseline % Time in Chambers | WT       | 38.1    | 2.4   | 36.4     | 1.9      | 13       | F                   | 5.3      | 1.2                 | 0.1 |
|                            |                             | KO       | 36.5    | 1.2   | 33.1     | 1.5      | 13       | p                   | 0.03     | ns                  | ns  |
|                            |                             |          | Mouse   |       | Object   |          |          |                     |          |                     |     |
|                            | % Time in Chamber           | WT       | 51.2    | 2.4   | 35.6     | 1.8      | 13       | F                   | 7.1      | 22.9                | 0.9 |
|                            |                             | KO       | 46.1    | 2.0   | 35.6     | 1.9      | 13       | p                   | 0.01     | 0.0001              | ns  |
|                            | % Time Sniffing             | WT       | 20.8    | 1.4   | 8.9      | 0.7      | 13       | F                   | 11.7     | 110.7               | 1.1 |
|                            |                             | KO       | 15.7    | 1.4   | 6.0      | 0.6      | 13       | p                   | 0.002    | 0.0001              | ns  |
|                            | Entries to Chamber          | WT       | 17.4    | 1.4   | 15.9     | 1.1      | 13       | F                   | 3.0      | 4.6                 | 0.6 |
| KO                         |                             | 22.4     | 2.7     | 19.2  | 1.9      | 13       | p        | ns                  | 0.04     | ns                  |     |
|                            |                             | Mean SE  |         | SE    |          |          | Genotype |                     |          |                     |     |
| Mouse Preference Time (%)  | WT                          | 58.8     |         | 2.3   |          | 13       | F        |                     | 0.6      |                     |     |
|                            | KO                          | 56.4     |         | 2.2   |          | 13       | p        |                     | ns       |                     |     |
| Mouse Sniffing (%)         | WT                          | 69.4     |         | 2.5   |          | 13       | F        |                     | 1.0      |                     |     |
|                            | KO                          | 72.3     |         | 1.6   |          | 13       | p        |                     | ns       |                     |     |
|                            |                             |          | Novel   |       | Familiar |          | n        | Genotype            | Stimulus | Genotype x Stimulus |     |
| % Time in Chamber          | WT                          | 51.1     | 1.6     | 33.7  | 1.7      | 13       | F        | 7.6                 | 23.9     | 2.0                 |     |
|                            | KO                          | 44.0     | 2.7     | 34.4  | 2.3      | 13       | p        | 0.01                | 0.0001   | ns                  |     |
| % Time Sniffing            | WT                          | 16.1     | 1.3     | 7.3   | 1.0      | 13       | F        | 10.1                | 37.5     | 3.7                 |     |
|                            | KO                          | 10.4     | 1.3     | 5.8   | 0.7      | 13       | p        | 0.004               | 0.0001   | ns                  |     |
| Entries into Chamber       | WT                          | 21.3     | 1.7     | 18.8  | 1.8      | 13       | F        | 2.3                 | 4.9      | 0.1                 |     |
|                            | KO                          | 24.8     | 2.2     | 23.0  | 2.1      | 13       | p        | ns                  | 0.04     | ns                  |     |
|                            |                             | Mean SE  |         | SE    |          |          | Genotype |                     |          |                     |     |
| Novel Mouse Preference (%) | WT                          | 60.3     |         | 1.7   |          | 13       | F        |                     | 1.7      |                     |     |
|                            | KO                          | 55.9     |         | 3.0   |          | 13       | p        |                     | ns       |                     |     |
| Novel Mouse Sniffing (%)   | WT                          | 68.8     |         | 3.4   |          | 13       | F        |                     | 1.3      |                     |     |
|                            | KO                          | 63.6     |         | 3.0   |          | 13       | p        |                     | ns       |                     |     |
