# Supplementary material for: Comprehensive Analysis of the 16p11.2 Deletion and Null Cntnap2 Mouse Models of Autism Spectrum Disorder
Source: PubMed Central journal article supplement (PMC4537259; doi:10.1371/journal.pone.0134572), 2015-08-14
Supplement: pone.0134572.s032.pdf [file pone.0134572.s032.pdf]

S17 Table. Reciprocal social interaction test for the 16p11.2 deletion model, same genotype stimulus.

| 16p11.2                                     |     |                                |       |      |                |       |   |
|---------------------------------------------|-----|--------------------------------|-------|------|----------------|-------|---|
|                                             |     | Genotype                       | Mean  | SE   | n              |       |   |
|                                             |     | Distance between subjects (cm) | WT    | 15.6 | 0.7            | 16    | F |
|                                             | HET | 13.3                           | 0.6   | 16   | p              | 0.02  |   |
| Distance moved (both mice, cm)              | WT  | 3564.2                         | 227.5 | 16   | F              | 0.8   |   |
|                                             | HET | 3493.9                         | 158.4 | 16   | p              | ns    |   |
| Time in 5 cm Proximity (s)                  | WT  | 34.0                           | 2.4   | 16   | F              | 3.0   |   |
|                                             | HET | 39.7                           | 2.2   | 16   | p              | ns    |   |
| Time nose-nose interaction (both mice, s)   | WT  | 32.2                           | 5.1   | 16   | F              | 0.4   |   |
|                                             | HET | 36.0                           | 2.7   | 16   | p              | ns    |   |
| Time nose-center interaction (both mice, s) | WT  | 27.6                           | 4.7   | 16   | F              | 2.7   |   |
|                                             | HET | 38.3                           | 4.5   | 16   | p              | ns    |   |
| Time nose-tail interaction (both mice, s)   | WT  | 51.6                           | 4.2   | 16   | F              | 6.2   |   |
|                                             | HET | 70.8                           | 6.4   | 16   | p              | 0.02  |   |
| All nose interactions (both mice, s)        | WT  | 111.4                          | 10.8  | 16   | F              | 4.3   |   |
|                                             | HET | 145.1                          | 12.1  | 16   | p              | 0.046 |   |
| Follow (s)                                  | WT  | 57.5                           | 2.2   | 16   | F              | 0.01  |   |
|                                             | HET | 55.4                           | 2.1   | 16   | p              | ns    |   |
| Active Social (%)                           | WT  | 13.6                           | 1.7   | 16   | F              | 0.1   |   |
|                                             | HET | 14.2                           | 1.5   | 16   | p              | ns    |   |
| Passive Social (%)                          | WT  | 9.3                            | 1.3   | 16   | F              | 0.5   |   |
|                                             | HET | 10.6                           | 1.2   | 16   | p              | ns    |   |
| Reciprocal Social (%)                       | WT  | 9.6                            | 1.1   | 16   | F              | 0.003 |   |
|                                             | HET | 9.7                            | 1.0   | 16   | p              | ns    |   |
| Total Social (%)                            | WT  | 32.6                           | 2.3   | 16   | F              | 0.4   |   |
|                                             | HET | 34.5                           | 2.1   | 16   | p              | ns    |   |
| Active Social (#/min)                       | WT  | 6.2                            | 0.4   | 16   | F              | 0.003 |   |
|                                             | HET | 6.3                            | 0.5   | 16   | p              | ns    |   |
| Passive Social (#/min)                      | WT  | 4.5                            | 0.6   | 16   | F              | 0.6   |   |
|                                             | HET | 5.1                            | 0.4   | 16   | p              | ns    |   |
| Reciprocal Social (#/min)                   | WT  | 4.6                            | 0.3   | 16   | F              | 0.5   |   |
|                                             | HET | 4.9                            | 0.4   | 16   | p              | ns    |   |
| Total Social (#/min)                        | WT  | 15.3                           | 0.8   | 16   | F              | 0.7   |   |
|                                             | HET | 16.3                           | 0.8   | 16   | p              | ns    |   |
| Ultrasonic vocalizations                    | WT  | 0.4                            | 0.8   | 16   | F <sup>1</sup> | -     |   |
|                                             | HET | 1.3                            | 1.1   | 16   | p              | -     |   |

Note. <sup>1</sup>Vocalizations were very infrequent (less than 1.5 in the 10 min test) and thus were not analyzed statistically.
