# Supplementary material for: Comprehensive Analysis of the 16p11.2 Deletion and Null Cntnap2 Mouse Models of Autism Spectrum Disorder
Source: PubMed Central journal article supplement (PMC4537259; doi:10.1371/journal.pone.0134572), 2015-08-14
Supplement: pone.0134572.s033.pdf [file pone.0134572.s033.pdf]

S18 Table. Reciprocal social interaction test for the 16p11.2 deletion model, WT stimulus.

| 16p11.2                                     |          |        |       |    |   |       |    |
|---------------------------------------------|----------|--------|-------|----|---|-------|----|
|                                             | Genotype | Mean   | SE    | n  | F | p     |    |
|                                             |          |        |       |    |   | ns    |    |
| Distance between subjects (cm)              | WT       | 16.6   | 0.6   | 16 | F | 3.1   |    |
|                                             | HET      | 14.8   | 0.8   | 16 | p |       | ns |
| Distance moved (both mice, cm)              | WT       | 4501.3 | 198.6 | 16 | F | 0.9   |    |
|                                             | HET      | 4721.2 | 125.8 | 16 | p |       | ns |
| Time in 5 cm Proximity (s)                  | WT       | 30.9   | 2.3   | 16 | F | 1.3   |    |
|                                             | HET      | 35.2   | 3.0   | 16 | p |       | ns |
| Time nose-nose interaction (both mice, s)   | WT       | 34.8   | 3.7   | 16 | F | 0.002 |    |
|                                             | HET      | 35.0   | 4.7   | 16 | p |       | ns |
| Time nose-center interaction (both mice, s) | WT       | 27.3   | 2.7   | 16 | F | 0.2   |    |
|                                             | HET      | 29.9   | 4.6   | 16 | p |       | ns |
| Time nose-tail interaction (both mice, s)   | WT       | 52.1   | 4.2   | 16 | F | 0.2   |    |
|                                             | HET      | 54.8   | 5.1   | 16 | p |       | ns |
| All nose interactions (both mice, s)        | WT       | 114.2  | 8.5   | 16 | F | 0.1   |    |
|                                             | HET      | 119.8  | 13.2  | 16 | p |       | ns |
| Follow (s)                                  | WT       | 68.7   | 2.3   | 16 | F | 1.0   |    |
|                                             | HET      | 71.7   | 1.7   | 16 | p |       | ns |
| Active Social (%)                           | WT       | 14.8   | 1.8   | 16 | F | 2.3   |    |
|                                             | HET      | 18.6   | 1.9   | 16 | p |       | ns |
| Passive Social (%)                          | WT       | 8.1    | 1.1   | 16 | F | 0.3   |    |
|                                             | HET      | 7.3    | 0.9   | 16 | p |       | ns |
| Reciprocal Social (%)                       | WT       | 10.9   | 1.5   | 16 | F | 0.2   |    |
|                                             | HET      | 10.2   | 1.2   | 16 | p |       | ns |
| Total Social (%)                            | WT       | 33.8   | 2.9   | 16 | F | 0.3   |    |
|                                             | HET      | 36.1   | 2.6   | 16 | p |       | ns |
| Active Social (#/min)                       | WT       | 6.9    | 0.6   | 16 | F | 1.2   |    |
|                                             | HET      | 7.9    | 0.7   | 16 | p |       | ns |
| Passive Social (#/min)                      | WT       | 4.6    | 0.5   | 16 | F | 0.5   |    |
|                                             | HET      | 4.1    | 0.4   | 16 | p |       | ns |
| Reciprocal Social (#/min)                   | WT       | 5.3    | 0.5   | 16 | F | 0.02  |    |
|                                             | HET      | 5.2    | 0.5   | 16 | p |       | ns |
| Total Social (#/min)                        | WT       | 16.9   | 1.1   | 16 | F | 0.1   |    |
|                                             | HET      | 17.3   | 12.0  | 16 | p |       | ns |
