# Supplementary material for: Comprehensive Analysis of the 16p11.2 Deletion and Null Cntnap2 Mouse Models of Autism Spectrum Disorder
Source: PubMed Central journal article supplement (PMC4537259; doi:10.1371/journal.pone.0134572), 2015-08-14
Supplement: pone.0134572.s034.pdf [file pone.0134572.s034.pdf]

S19 Table. Reciprocal social interaction test for the Cntnap2 knockout model, same genotype stimulus.

| Cntnap2                                     |    |                                |       |      |     |       |   |
|---------------------------------------------|----|--------------------------------|-------|------|-----|-------|---|
|                                             |    | Genotype                       | Mean  | SE   | n   |       |   |
|                                             |    | Distance between subjects (cm) | WT    | 16.3 | 0.5 | 14    | F |
|                                             | KO | 16.1                           | 0.6   | 16   | p   | ns    |   |
| Distance moved (both mice, cm)              | WT | 5306.2                         | 226.9 | 14   | F   | 2.7   |   |
|                                             | KO | 5810.2                         | 209.0 | 16   | p   | ns    |   |
| Time in 5 cm Proximity (s)                  | WT | 28.4                           | 2.2   | 14   | F   | 0.1   |   |
|                                             | KO | 29.3                           | 1.8   | 16   | p   | ns    |   |
| Time nose-nose interaction (both mice, s)   | WT | 23.4                           | 3.3   | 14   | F   | 0.1   |   |
|                                             | KO | 22.3                           | 1.4   | 16   | p   | ns    |   |
| Time nose-center interaction (both mice, s) | WT | 30.7                           | 2.7   | 14   | F   | 0.1   |   |
|                                             | KO | 31.8                           | 3.1   | 16   | p   | ns    |   |
| Time nose-tail interaction (both mice, s)   | WT | 43.7                           | 3.3   | 14   | F   | 0.01  |   |
|                                             | KO | 43.2                           | 4.3   | 16   | p   | ns    |   |
| All nose interactions (both mice, s)        | WT | 97.8                           | 6.3   | 14   | F   | 0.003 |   |
|                                             | KO | 97.3                           | 6.6   | 16   | p   | ns    |   |
| Follow (s)                                  | WT | 75.0                           | 2.7   | 14   | F   | 2.3   |   |
|                                             | KO | 80.5                           | 2.4   | 16   | p   | ns    |   |
| Active Social (s)                           | WT | 15.8                           | 2.0   | 14   | F   | 0.5   |   |
|                                             | KO | 14.0                           | 1.6   | 16   | p   | ns    |   |
| Passive Social (s)                          | WT | 6.7                            | 0.7   | 14   | F   | 0.1   |   |
|                                             | KO | 6.4                            | 1.0   | 16   | p   | ns    |   |
| Reciprocal Social (s)                       | WT | 6.2                            | 0.5   | 14   | F   | 0.2   |   |
|                                             | KO | 5.8                            | 0.7   | 16   | p   | ns    |   |
| Total Social (s)                            | WT | 28.7                           | 2.1   | 14   | F   | 1.0   |   |
|                                             | KO | 26.1                           | 1.5   | 16   | p   | ns    |   |
| Active Social (#/min)                       | WT | 7.6                            | 0.4   | 14   | F   | 0.9   |   |
|                                             | KO | 8.3                            | 0.6   | 16   | p   | ns    |   |
| Passive Social (#/min)                      | WT | 4.9                            | 0.5   | 14   | F   | 0.01  |   |
|                                             | KO | 5.0                            | 0.6   | 16   | p   | ns    |   |
| Reciprocal Social (#/min)                   | WT | 5.0                            | 0.5   | 14   | F   | 0.6   |   |
|                                             | KO | 4.6                            | 0.4   | 16   | p   | ns    |   |
| Total Social (#/min)                        | WT | 17.6                           | 1.0   | 14   | F   | 0.1   |   |
|                                             | KO | 17.9                           | 0.8   | 16   | p   | ns    |   |
| Ultrasonic vocalizations                    | WT | 0.8                            | 0.4   | 14   | F1  | -     |   |
|                                             | KO | 1.1                            | 0.6   | 16   | p   | -     |   |

Note. <sup>1</sup>Vocalizations were very infrequent (less than 1.5 in the 10 min test) and thus were not analyzed statistically.
