# Supplementary material for: Comprehensive Analysis of the 16p11.2 Deletion and Null Cntnap2 Mouse Models of Autism Spectrum Disorder
Source: PubMed Central journal article supplement (PMC4537259; doi:10.1371/journal.pone.0134572), 2015-08-14
Supplement: pone.0134572.s035.pdf [file pone.0134572.s035.pdf]

S20 Table. Reciprocal social interaction test for the Cntnap2 knockout model, WT stimulus.

| Cntnap2                                     |          |        |       |    |   |       |  |
|---------------------------------------------|----------|--------|-------|----|---|-------|--|
|                                             | Genotype | Mean   | SE    | n  |   |       |  |
|                                             |          |        |       |    | F | p     |  |
| Distance between subjects (cm)              | WT       | 16.6   | 0.8   | 16 | F | 0.02  |  |
|                                             | KO       | 16.7   | 0.5   | 16 | p | ns    |  |
| Distance moved (both mice, cm)              | WT       | 5701.2 | 236.8 | 16 | F | 2.0   |  |
|                                             | KO       | 6225.9 | 282.6 | 16 | p | ns    |  |
| Time in 5 cm Proximity (s)                  | WT       | 30.6   | 2.8   | 16 | F | 0.1   |  |
|                                             | KO       | 29.4   | 2.1   | 16 | p | ns    |  |
| Time nose-nose interaction (both mice, s)   | WT       | 29.8   | 3.9   | 16 | F | 0.1   |  |
|                                             | KO       | 28.6   | 2.5   | 16 | p | ns    |  |
| Time nose-center interaction (both mice, s) | WT       | 26.3   | 2.9   | 16 | F | 1.3   |  |
|                                             | KO       | 21.8   | 2.7   | 16 | p | ns    |  |
| Time nose-tail interaction (both mice, s)   | WT       | 44.7   | 4.3   | 16 | F | 0.02  |  |
|                                             | KO       | 43.7   | 5.3   | 16 | p | ns    |  |
| All nose interactions (both mice, s)        | WT       | 100.8  | 9.7   | 16 | F | 0.3   |  |
|                                             | KO       | 94.2   | 9.1   | 16 | p | ns    |  |
| Follow (s)                                  | WT       | 82.1   | 3.0   | 16 | F | 2.3   |  |
|                                             | KO       | 89.1   | 3.5   | 16 | p | ns    |  |
| Active Social (s)                           | WT       | 16.8   | 2.5   | 16 | F | 0.2   |  |
|                                             | KO       | 18.1   | 1.2   | 16 | p | ns    |  |
| Passive Social (s)                          | WT       | 5.7    | 0.8   | 16 | F | 0.003 |  |
|                                             | KO       | 5.7    | 0.9   | 16 | p | ns    |  |
| Reciprocal Social (s)                       | WT       | 8.1    | 0.9   | 16 | F | 0.6   |  |
|                                             | KO       | 7.1    | 0.9   | 16 | p | ns    |  |
| Total Social (s)                            | WT       | 30.7   | 3.2   | 16 | F | 0.01  |  |
|                                             | KO       | 30.9   | 1.7   | 16 | p | ns    |  |
| Active Social (#/min)                       | WT       | 7.4    | 0.8   | 16 | F | 2.8   |  |
|                                             | KO       | 9.0    | 0.5   | 16 | p | ns    |  |
| Passive Social (#/min)                      | WT       | 3.7    | 0.4   | 16 | F | 1.3   |  |
|                                             | KO       | 4.3    | 0.4   | 16 | p | ns    |  |
| Reciprocal Social (#/min)                   | WT       | 5.1    | 0.4   | 16 | F | 1.3   |  |
|                                             | KO       | 5.7    | 0.4   | 16 | p | ns    |  |
| Total Social (#/min)                        | WT       | 16.2   | 1.2   | 16 | F | 4.0   |  |
|                                             | KO       | 19.0   | 0.8   | 16 | p | ns    |  |
