# Supplementary material for: Comprehensive Analysis of the 16p11.2 Deletion and Null Cntnap2 Mouse Models of Autism Spectrum Disorder
Source: PubMed Central journal article supplement (PMC4537259; doi:10.1371/journal.pone.0134572), 2015-08-14
Supplement: pone.0134572.s036.pdf [file pone.0134572.s036.pdf]

**S21 Table. Urine exposure open field test for the 16p11.2 deletion model**

| 16p11.2                     |                       |                        |          |         |        |     |       |       |
|-----------------------------|-----------------------|------------------------|----------|---------|--------|-----|-------|-------|
|                             | Measure               | Genotype               | Mean     | SE      | n      |     |       |       |
|                             |                       |                        |          |         |        | F   | p     |       |
| Urine Open Field            | Baseline              | Distance Traveled (cm) | WT       | 23895.8 | 9588.4 | 16  | F     | 0.1   |
|                             |                       |                        | HET      | 19803.4 | 5104.6 | 16  | p     | ns    |
|                             |                       | Center Time (%)        | WT       | 5.9     | 1.2    | 16  | F     | 8.2   |
|                             |                       |                        | HET      | 16.7    | 3.6    | 16  | p     | 0.008 |
|                             |                       | Center Distance (cm)   | WT       | 2444.1  | 870.3  | 16  | F     | 2.1   |
|                             |                       |                        | HET      | 4716.7  | 1300.6 | 16  | p     | ns    |
|                             |                       | Scent Marking (#)      | WT       | 21.8    | 6.7    | 16  | F     | 0.5   |
|                             |                       |                        | HET      | 28.9    | 7.8    | 16  | p     | ns    |
|                             | Scent Marking (Pixel) | WT                     | 194530.3 | 66640.6 | 16     | F   | 0.003 |       |
|                             |                       | HET                    | 199224.9 | 47835.5 | 16     | p   | ns    |       |
|                             | Urine Exposure        | Distance Traveled (cm) | WT       | 741.1   | 58.7   | 16  | F     | 4.6   |
|                             |                       |                        | HET      | 930.2   | 66.2   | 16  | p     | 0.041 |
|                             |                       | Center Time (%)        | WT       | 13.0    | 1.2    | 16  | F     | 2.5   |
|                             |                       |                        | HET      | 16.0    | 1.4    | 16  | p     | ns    |
|                             |                       | Center Distance (cm)   | WT       | 131.2   | 18.2   | 16  | F     | 3.3   |
|                             |                       |                        | HET      | 203.1   | 35.4   | 16  | p     | ns    |
|                             |                       | Scent Marking (#)      | WT       | 12.6    | 4.5    | 16  | F     | 1.0   |
|                             |                       |                        | HET      | 20.0    | 5.8    | 16  | p     | ns    |
| Scent Marking (Pixel)       |                       | WT                     | 44881.6  | 17432.0 | 16     | F   | 1.3   |       |
|                             |                       | HET                    | 75448.9  | 19715.8 | 16     | p   | ns    |       |
| Ultrasonic Vocalization (#) | WT                    | 74.0                   | 39.0     | 16      | F      | 1.2 |       |       |
|                             | HET                   | 150.2                  | 57.5     | 16      | p      | ns  |       |       |
