# Supplementary material for: Comprehensive Analysis of the 16p11.2 Deletion and Null Cntnap2 Mouse Models of Autism Spectrum Disorder
Source: PubMed Central journal article supplement (PMC4537259; doi:10.1371/journal.pone.0134572), 2015-08-14
Supplement: pone.0134572.s037.pdf [file pone.0134572.s037.pdf]

S22 Table. Urine exposure open field test for the Cntnap2 knockout model.

| Cntnap2                     |                       |                        |          |         |        |       |      |       |
|-----------------------------|-----------------------|------------------------|----------|---------|--------|-------|------|-------|
|                             | Measure               | Genotype               | Mean     | SE      | n      |       |      |       |
|                             |                       |                        |          |         |        | F     | p    |       |
| Urine Open Field            | Baseline              | Distance Traveled (cm) | WT       | 23022.0 | 5107.7 | 16    | F    | 1.6   |
|                             |                       |                        | KO       | 15247.2 | 3279.0 | 16    | p    | ns    |
|                             |                       | Center Time (%)        | WT       | 17.4    | 1.5    | 16    | F    | 0.03  |
|                             |                       |                        | KO       | 17.0    | 1.8    | 16    | p    | ns    |
|                             |                       | Center Distance (cm)   | WT       | 5520.6  | 1115.4 | 16    | F    | 1.4   |
|                             |                       |                        | KO       | 3946.8  | 730.6  | 16    | p    | ns    |
|                             |                       | Scent Marking (#)      | WT       | 40.4    | 9.3    | 16    | F    | 3.9   |
|                             |                       |                        | KO       | 19.5    | 5.2    | 16    | p    | 0.06  |
|                             | Scent Marking (Pixel) | WT                     | 303645.5 | 67223.1 | 16     | F     | 5.3  |       |
|                             |                       | KO                     | 130758.0 | 32725.3 | 16     | p     | 0.03 |       |
|                             | Urine Exposure        | Distance Traveled (cm) | WT       | 974.5   | 52.8   | 16    | F    | 21.2  |
|                             |                       |                        | KO       | 1251.2  | 25.2   | 16    | p    | 0.001 |
|                             |                       | Center Time (%)        | WT       | 17.9    | 1.6    | 16    | F    | 0.4   |
|                             |                       |                        | KO       | 16.5    | 1.5    | 16    | p    | ns    |
|                             |                       | Center Distance (cm)   | WT       | 181.6   | 20.2   | 16    | F    | 2.1   |
|                             |                       |                        | KO       | 218.0   | 16.9   | 16    | p    | ns    |
| Scent Marking (#)           |                       | WT                     | 31.5     | 9.0     | 16     | F     | 2.4  |       |
|                             |                       | KO                     | 15.7     | 5.0     | 16     | p     | ns   |       |
| Scent Marking (Pixel)       |                       | WT                     | 114182.8 | 37762.3 | 16     | F     | 1.0  |       |
|                             |                       | KO                     | 67047.9  | 27579.9 | 16     | p     | ns   |       |
| Ultrasonic Vocalization (#) | WT                    | 454.1                  | 101.0    | 16      | F      | 6.9   |      |       |
|                             | KO                    | 152.3                  | 54.0     | 16      | p      | 0.013 |      |       |
