# Supplementary material for: Comprehensive Analysis of the 16p11.2 Deletion and Null Cntnap2 Mouse Models of Autism Spectrum Disorder
Source: PubMed Central journal article supplement (PMC4537259; doi:10.1371/journal.pone.0134572), 2015-08-14
Supplement: pone.0134572.s038.pdf [file pone.0134572.s038.pdf]

S23 Table. T-maze test for the 16p11.2 deletion model.

| 16p11.2 |                 |                         |          |            |     |          |            |                    |
|---------|-----------------|-------------------------|----------|------------|-----|----------|------------|--------------------|
| T-Maze  | Measure         |                         | Genotype | Proportion |     | n        |            |                    |
|         | Acquisition     | Proportion to Criterion | WT       | 0.9        |     | 16       | Chi Square | 3.7                |
|         |                 |                         | HET      | 1.0        |     | 16       | <i>p</i>   | ns                 |
|         |                 |                         |          | Mean       | SE  |          |            |                    |
|         |                 | Days to Criterion       | WT       | 3.3        | 0.3 | 16       | t          | -1.7               |
|         | HET             |                         | 2.8      | 0.3        | 16  | <i>p</i> | ns         |                    |
|         | Reversal        | Proportion to Criterion | WT       | 0.9        |     | 15       | Chi Square | 0.02               |
|         |                 |                         | HET      | 0.9        |     | 16       | <i>p</i>   | ns                 |
|         |                 |                         |          | Mean       | SE  |          |            |                    |
|         |                 | Days to Criterion       | WT       | 3.4        | 0.3 | 15       | t          | -0.3               |
|         |                 |                         | HET      | 3.2        | 0.1 | 16       | <i>p</i>   | ns                 |
|         |                 |                         |          | n          |     | Genotype | Session    | Genotype x Session |
|         | Percent Correct | WT                      | 15       | F          | 2.0 | 51.9     | 1.8        |                    |
|         |                 | HET                     | 16       | <i>p</i>   | ns  | 0.0001   | ns         |                    |
