# Supplementary material for: Comprehensive Analysis of the 16p11.2 Deletion and Null Cntnap2 Mouse Models of Autism Spectrum Disorder
Source: PubMed Central journal article supplement (PMC4537259; doi:10.1371/journal.pone.0134572), 2015-08-14
Supplement: pone.0134572.s039.pdf [file pone.0134572.s039.pdf]

S24 Table. T-maze test for the Cntnap2 knockout model.

| Cntnap2 |             |                         |          |            |          |          |            |                    |  |
|---------|-------------|-------------------------|----------|------------|----------|----------|------------|--------------------|--|
| T-Maze  | Measure     |                         | Genotype | Proportion |          | n        |            |                    |  |
|         | Acquisition | Proportion to Criterion | WT       | 1.0        |          | 13       | Chi Square | 6.0                |  |
|         |             |                         | KO       | 1.0        |          | 13       | <i>p</i>   | 0.01               |  |
|         |             |                         |          | Mean       | SE       |          |            |                    |  |
|         |             | Days to Criterion       | WT       | 3.6        | 0.3      | 13       | t          | -2.7               |  |
|         | KO          |                         | 2.7      | 0.1        | 13       | <i>p</i> | 0.01       |                    |  |
|         | Reversal    | Proportion to Criterion | WT       | 1.0        |          | 13       | Chi Square | 0.0001             |  |
|         |             |                         | KO       | 1.0        |          | 13       | <i>p</i>   | -                  |  |
|         |             |                         |          | Mean       | SE       |          |            |                    |  |
|         |             | Days to Criterion       | WT       | 2.9        | 0.1      | 13       | t          | 0.0001             |  |
|         |             |                         | KO       | 2.9        | 0.1      | 13       | <i>p</i>   | -                  |  |
|         |             |                         |          | n          |          | Genotype | Session    | Genotype x Session |  |
|         |             | Percent Correct         | WT       | 13         | F        | 0.2      | 89.7       | 0.6                |  |
|         |             |                         | KO       | 13         | <i>p</i> | ns       | 0.0001     | ns                 |  |
