# Supplementary material for: Comprehensive Analysis of the 16p11.2 Deletion and Null Cntnap2 Mouse Models of Autism Spectrum Disorder
Source: PubMed Central journal article supplement (PMC4537259; doi:10.1371/journal.pone.0134572), 2015-08-14
Supplement: pone.0134572.s040.pdf [file pone.0134572.s040.pdf]

**S25 Table. Startle and prepulse inhibition of startle for the 16p11.2 deletion model.**

| 16p11.2             |          |       |       |      |          |      |     |    |          |                |                  |     |
|---------------------|----------|-------|-------|------|----------|------|-----|----|----------|----------------|------------------|-----|
| Measure             | Genotype | Mean  | SE    | n    |          |      |     |    |          |                |                  |     |
| Startle             | WT       | 629.2 | 100.6 | 16   | <b>F</b> | 1.9  |     |    |          |                |                  |     |
|                     | HET      | 468.5 | 60.7  | 16   | <b>p</b> | ns   |     |    |          |                |                  |     |
| Measure             | Genotype | 74    |       | 78   |          | 82   |     | n  | Genotype | Prepulse Level | Genotype x Level |     |
| Prepulse Inhibition | WT       | 26.4  | 4.7   | 39.3 | 3.8      | 43.8 | 6.6 | 16 | <b>F</b> | 0.01           | 36.1             | 1.8 |
|                     | HET      | 22.5  | 3.5   | 36.7 | 4.9      | 48.9 | 3.9 | 16 | <b>p</b> | ns             | 0.0001           | ns  |
