# Supplementary material for: Comprehensive Analysis of the 16p11.2 Deletion and Null Cntnap2 Mouse Models of Autism Spectrum Disorder
Source: PubMed Central journal article supplement (PMC4537259; doi:10.1371/journal.pone.0134572), 2015-08-14
Supplement: pone.0134572.s041.pdf [file pone.0134572.s041.pdf]

**S26 Table. Startle and prepulse inhibition of startle for the Cntnap2 knockout model.**

| Cntnap2             |          |       |      |      |          |      |     |    |          |                |                  |      |
|---------------------|----------|-------|------|------|----------|------|-----|----|----------|----------------|------------------|------|
| Measure             | Genotype | Mean  | SE   | n    |          |      |     |    |          |                |                  |      |
| Startle             | WT       | 723.7 | 56.5 | 16   | <b>F</b> | 0.2  |     |    |          |                |                  |      |
|                     | KO       | 696.6 | 33.0 | 16   | <b>p</b> | ns   |     |    |          |                |                  |      |
| Measure             | Genotype | 74    |      | 78   |          | 82   |     | n  | Genotype | Prepulse Level | Genotype x Level |      |
| Prepulse Inhibition | WT       | 10.6  | 3.9  | 21.7 | 4.1      | 30.1 | 5.0 | 16 | <b>F</b> | 6.5            | 53.2             | 0.01 |
|                     | KO       | 24.6  | 4.6  | 35.8 | 4.2      | 44.6 | 3.5 | 16 | <b>p</b> | 0.02           | 0.0001           | ns   |
