# Supplementary material for: Comprehensive Analysis of the 16p11.2 Deletion and Null Cntnap2 Mouse Models of Autism Spectrum Disorder
Source: PubMed Central journal article supplement (PMC4537259; doi:10.1371/journal.pone.0134572), 2015-08-14
Supplement: pone.0134572.s042.pdf [file pone.0134572.s042.pdf]

**S27 Table. Marble burying test for the 16p11.2 deletion model.**

| 16p11.2        |                |          |        |        |       |          |          |      |
|----------------|----------------|----------|--------|--------|-------|----------|----------|------|
| Marble-Burying | Measure        | Genotype | Mean   | SE     | n     |          |          |      |
|                | Marbles Buried | WT       |        | 14.1   | 1.3   | 16       | F        | 0.01 |
|                |                | HET      |        | 14.3   | 1.6   | 16       | <i>p</i> | ns   |
|                | Total Distance | WT       |        | 7201.3 | 434.4 | 16       | F        | 5.0  |
| HET            |                |          | 8769.6 | 542.7  | 15    | <i>p</i> | 0.03     |      |
