# Supplementary material for: Comprehensive Analysis of the 16p11.2 Deletion and Null Cntnap2 Mouse Models of Autism Spectrum Disorder
Source: PubMed Central journal article supplement (PMC4537259; doi:10.1371/journal.pone.0134572), 2015-08-14
Supplement: pone.0134572.s043.pdf [file pone.0134572.s043.pdf]

**S28 Table. Marble burying test for the Cntnap2 knockout model.**

| <b>Cntnap2</b>        |                       |                 |             |           |          |          |     |
|-----------------------|-----------------------|-----------------|-------------|-----------|----------|----------|-----|
| <b>Marble-Burying</b> | <b>Measure</b>        | <b>Genotype</b> | <b>Mean</b> | <b>SE</b> | <b>n</b> |          |     |
|                       | <b>Marbles Buried</b> | <b>WT</b>       | 14.8        | 1.1       | 16       | <b>F</b> | 3.0 |
|                       |                       | <b>KO</b>       | 11.8        | 1.3       | 16       | <b>p</b> | ns  |
|                       | <b>Total Distance</b> | <b>WT</b>       | 7720.1      | 361.7     | 16       | <b>F</b> | 0.1 |
| <b>KO</b>             |                       | 7833.0          | 324.0       | 15        | <b>p</b> | ns       |     |
