# Supplementary material for: Comprehensive Analysis of the 16p11.2 Deletion and Null Cntnap2 Mouse Models of Autism Spectrum Disorder
Source: PubMed Central journal article supplement (PMC4537259; doi:10.1371/journal.pone.0134572), 2015-08-14
Supplement: pone.0134572.s045.pdf [file pone.0134572.s045.pdf]

**3-Chamber Test**

| Number of mice | Genotype     | Habituation - Left Side Time (%) | Habituation - Center Time (%) | Habituation - Right Time (%) | Sociability - Mouse Time (%) | Sociability - Center Time (%) | Sociability - Object Time (%) | Sociability - Mouse Sniff Time | Sociability - Object Sniff Time | Recognition - Familiar Mouse Time (%) | Recognition - Center Time (%) | Recognition - Novel Mouse Time (%) | Recognition - Familiar Mouse Sniff Time | Recognition - Novel Mouse Sniff Time | Sociability - Crossings to Mouse Side (#) | Sociability - Crossings to Object Side (#) | Recognition - Crossings to Familiar Mouse (#) | Recognition - Crossings to Novel Mouse (#) |
|----------------|--------------|----------------------------------|-------------------------------|------------------------------|------------------------------|-------------------------------|-------------------------------|--------------------------------|---------------------------------|---------------------------------------|-------------------------------|------------------------------------|-----------------------------------------|--------------------------------------|-------------------------------------------|--------------------------------------------|-----------------------------------------------|--------------------------------------------|
| 1              | 16p11.2 WT   | 33.135                           | 37.528                        | 29.337                       | 76.3                         | 9.693                         | 14.0                          | 188.9                          | 28.7                            | 30.3                                  | 3.788                         | 65.9                               | 71.0                                    | 179.8                                | 39.0                                      | 9.0                                        | 14.0                                          | 11.0                                       |
| 2              | 16p11.2 WT   | 31.97                            | 33.364                        | 34.666                       | 61.0                         | 11.6                          | 27.4                          | 132.4                          | 14.5                            | 34.2                                  | 18.47                         | 47.4                               | 33.8                                    | 51.5                                 | 27.0                                      | 19.0                                       | 209.0                                         | 166.0                                      |
| 3              | 16p11.2 WT   | 27.61                            | 31.17                         | 41.22                        | 63.3                         | 7.382                         | 29.3                          | 170.9                          | 42.4                            | 28.1                                  | 7.39                          | 64.5                               | 44.7                                    | 186.7                                | 13.0                                      | 14.0                                       | 26.0                                          | 11.0                                       |
| 4              | 16p11.2 WT   | 26.202                           | 50.052                        | 23.746                       | 2.1                          | 40.681                        | 57.2                          | 0.0                            | 88.3                            | 16.0                                  | 13.154                        | 70.8                               | 26.2                                    | 129.7                                | 12.0                                      | 20.0                                       | 23.0                                          | 30.0                                       |
| 5              | 16p11.2 WT   | 20.014                           | 39.211                        | 40.775                       | 78.9                         | 7.339                         | 13.7                          | 208.3                          | 18.6                            | 36.0                                  | 13.506                        | 50.5                               | 38.6                                    | 62.3                                 | 10.0                                      | 8.0                                        | 11.0                                          | 18.0                                       |
| 6              | 16p11.2 WT   | 0                                | 100                           | 0                            | 79.6                         | 5.967                         | 14.5                          | 263.7                          | 28.8                            | 56.5                                  | 12.162                        | 31.4                               | 89.0                                    | 61.2                                 | 4.0                                       | 6.0                                        | 12.0                                          | 33.0                                       |
| 7              | 16p11.2 WT   | 10.71                            | 44.538                        | 44.752                       | 67.0                         | 10.332                        | 22.7                          | 168.3                          | 53.5                            | 42.5                                  | 17.398                        | 40.1                               | 73.9                                    | 83.2                                 | 9.0                                       | 4.0                                        | 12.0                                          | 9.0                                        |
| 8              | 16p11.2 WT   | 23.854                           | 33.155                        | 42.991                       | 29.9                         | 12.435                        | 57.7                          | 90.2                           | 142.1                           | 30.9                                  | 22.867                        | 46.2                               | 62.9                                    | 47.6                                 | 6.0                                       | 9.0                                        | 15.0                                          | 18.0                                       |
| 9              | 16p11.2 WT   | 0                                | 93.702                        | 6.298                        | 42.3                         | 17.511                        | 40.2                          | 120.1                          | 78.0                            | 53.1                                  | 9.642                         | 37.3                               | 109.2                                   | 71.5                                 | 4.0                                       | 9.0                                        | 10.0                                          | 9.0                                        |
| 10             | 16p11.2 WT   | 29.476                           | 24.036                        | 46.488                       | 66.9                         | 7.873                         | 25.2                          | 132.4                          | 41.0                            | 45.7                                  | 10.792                        | 43.5                               | 36.1                                    | 68.1                                 | 7.0                                       | 8.0                                        | 9.0                                           | 21.0                                       |
| 11             | 16p11.2 WT   | 31.055                           | 24.618                        | 44.327                       | 48.6                         | 6.424                         | 45.0                          | 104.9                          | 27.2                            | 27.5                                  | 9.775                         | 62.8                               | 35.4                                    | 80.1                                 | 12.0                                      | 9.0                                        | 14.0                                          | 14.0                                       |
| 12             | 16p11.2 WT   | 16.946                           | 28.622                        | 54.431                       | 62.4                         | 10.186                        | 27.4                          | 163.2                          | 41.5                            | 40.4                                  | 10.05                         | 49.5                               | 47.6                                    | 77.5                                 | 15.0                                      | 17.0                                       | 16.0                                          | 24.0                                       |
| 13             | 16p11.2 WT   | 9.65                             | 75.996                        | 14.355                       | 52.2                         | 17.24                         | 30.6                          | 113.7                          | 44.5                            | 29.5                                  | 12.108                        | 58.3                               | 18.7                                    | 140.5                                | 8.0                                       | 8.0                                        | 7.0                                           | 15.0                                       |
| 14             | 16p11.2 WT   | 16.004                           | 53.128                        | 30.868                       | 57.1                         | 20.91                         | 21.9                          | 161.1                          | 22.1                            | 44.2                                  | 11.003                        | 44.8                               | 84.6                                    | 83.5                                 | 9.0                                       | 17.0                                       | 19.0                                          | 35.0                                       |
| 15             | 16p11.2 WT   | 44.102                           | 30.984                        | 24.915                       | 41.7                         | 18.331                        | 40.0                          | 97.8                           | 56.1                            | 35.4                                  | 13.15                         | 51.5                               | 48.8                                    | 88.8                                 | 126.0                                     | 13.0                                       | 28.0                                          | 37.0                                       |
| 16             | 16p11.2 WT   | 28.591                           | 46.325                        | 25.084                       | 65.7                         | 9.368                         | 25.0                          | 189.9                          | 39.3                            | 31.3                                  | 12.004                        | 56.7                               | 60.1                                    | 140.9                                | 14.0                                      | 13.0                                       | 29.0                                          | 30.0                                       |
| 1              | 16p11.2 df/+ | 24.628                           | 35.351                        | 40.021                       | 49.1                         | 19.681                        | 31.3                          | 94.3                           | 32.4                            | 40.2                                  | 5.764                         | 54.1                               | 68.3                                    | 130.1                                | 12.0                                      | 13.0                                       | 17.0                                          | 17.0                                       |
| 2              | 16p11.2 df/+ | 31.135                           | 32.14                         | 36.725                       | 49.4                         | 10.912                        | 39.7                          | 133.1                          | 41.8                            | 27.8                                  | 10.172                        | 62.1                               | 44.7                                    | 155.6                                | 31.0                                      | 20.0                                       | 20.0                                          | 21.0                                       |
| 3              | 16p11.2 df/+ | 27.341                           | 30.318                        | 42.342                       | 59.2                         | 8.005                         | 32.8                          | 121.6                          | 74.9                            | 31.8                                  | 8.268                         | 59.9                               | 39.6                                    | 127.8                                | 15.0                                      | 12.0                                       | 56.0                                          | 63.0                                       |
| 4              | 16p11.2 df/+ | 26.984                           | 37.289                        | 35.726                       | 32.0                         | 18.334                        | 49.6                          | 72.1                           | 89.1                            | 25.2                                  | 19.047                        | 55.7                               | 30.0                                    | 104.9                                | 15.0                                      | 11.0                                       | 23.0                                          | 24.0                                       |
| 5              | 16p11.2 df/+ | 31.772                           | 27.882                        | 40.346                       | 50.3                         | 11.248                        | 38.5                          | 142.0                          | 39.2                            | 33.2                                  | 16.879                        | 50.0                               | 44.4                                    | 89.1                                 | 12.0                                      | 12.0                                       | 31.0                                          | 27.0                                       |
| 6              | 16p11.2 df/+ | 42.496                           | 57.504                        | 0                            | 76.0                         | 4.468                         | 19.6                          | 206.5                          | 32.3                            | 30.3                                  | 17.807                        | 51.9                               | 66.8                                    | 106.1                                | 4.0                                       | 5.0                                        | 12.0                                          | 16.0                                       |
| 7              | 16p11.2 df/+ | 29.907                           | 47.943                        | 22.15                        | 53.2                         | 12.259                        | 34.6                          | 144.0                          | 52.9                            | 44.9                                  | 14.002                        | 41.1                               | 98.6                                    | 59.1                                 | 20.0                                      | 12.0                                       | 37.0                                          | 11.0                                       |
| 8              | 16p11.2 df/+ | 29.588                           | 33.147                        | 37.265                       | 48.5                         | 11.045                        | 40.5                          | 140.8                          | 56.8                            | 43.6                                  | 15.625                        | 40.8                               | 52.4                                    | 36.2                                 | 20.0                                      | 15.0                                       | 27.0                                          | 22.0                                       |
| 9              | 16p11.2 df/+ | 30.04                            | 26.768                        | 43.192                       | 56.4                         | 12.905                        | 30.7                          | 154.8                          | 48.4                            | 48.2                                  | 9.036                         | 42.8                               | 37.5                                    | 55.3                                 | 27.0                                      | 11.0                                       | 24.0                                          | 12.0                                       |
| 10             | 16p11.2 df/+ | 16.344                           | 33.291                        | 50.365                       | 67.9                         | 9.361                         | 22.7                          | 121.4                          | 30.8                            | 25.7                                  | 6.237                         | 68.0                               | 26.3                                    | 71.4                                 | 4.0                                       | 8.0                                        | 4.0                                           | 9.0                                        |
| 11             | 16p11.2 df/+ | 13.191                           | 57.645                        | 29.164                       | 43.9                         | 10.757                        | 45.3                          | 114.5                          | 81.8                            | 44.6                                  | 11.896                        | 43.5                               | 87.4                                    | 68.6                                 | 6.0                                       | 8.0                                        | 25.0                                          | 6.0                                        |
| 12             | 16p11.2 df/+ | 32.927                           | 31.906                        | 35.167                       | 61.9                         | 7.097                         | 31.0                          | 139.7                          | 59.2                            | 52.7                                  | 6.208                         | 41.1                               | 37.9                                    | 91.4                                 | 6.0                                       | 7.0                                        | 8.0                                           | 12.0                                       |
| 13             | 16p11.2 df/+ | 24.658                           | 25.929                        | 49.412                       | 52.5                         | 11.678                        | 35.8                          | 149.4                          | 34.3                            | 42.0                                  | 15.342                        | 42.6                               | 66.7                                    | 71.8                                 | 26.0                                      | 17.0                                       | 36.0                                          | 20.0                                       |
| 14             | 16p11.2 df/+ | 22.025                           | 25.044                        | 52.931                       | 83.0                         | 5.119                         | 11.9                          | 214.1                          | 19.3                            | 37.5                                  | 8.951                         | 53.6                               | 55.5                                    | 104.5                                | 12.0                                      | 8.0                                        | 15.0                                          | 19.0                                       |
| 15             | 16p11.2 df/+ | 26.94                            | 45.777                        | 27.283                       | 67.8                         | 19.644                        | 12.6                          | 131.1                          | 10.1                            | 42.5                                  | 10.305                        | 47.2                               | 49.3                                    | 60.3                                 | 18.0                                      | 7.0                                        | 48.0                                          | 49.0                                       |
| 16             | 16p11.2 df/+ | 42.862                           | 29.297                        | 27.841                       | 94.4                         | 5.299                         | 0.3                           | 298.1                          | 0.0                             | 48.9                                  | 7.373                         | 43.8                               | 54.7                                    | 96.4                                 | 18.0                                      | 6.0                                        | 17.0                                          | 15.0                                       |
| 1              | Cntnap2 WT   | 40.157                           | 27.245                        | 32.598                       | 34.3                         | 18.961                        | 46.7                          | 79.3                           | 52.2                            | 25.8                                  | 12.458                        | 61.7                               | 22.7                                    | 138.0                                | 23.0                                      | 18.0                                       | 20.0                                          | 21.0                                       |
| 2              | Cntnap2 WT   | 45.009                           | 22.418                        | 32.573                       | 53.4                         | 13.208                        | 33.4                          | 125.9                          | 50.0                            | 44.3                                  | 13.669                        | 42.1                               | 95.4                                    | 56.4                                 | 21.0                                      | 11.0                                       | 26.0                                          | 24.0                                       |
| 3              | Cntnap2 WT   | 31.742                           | 34.383                        | 33.875                       | 68.8                         | 8.94                          | 22.2                          | 163.0                          | 40.6                            | 37.0                                  | 12.656                        | 50.3                               | 30.9                                    | 103.7                                | 13.0                                      | 11.0                                       | 23.0                                          | 19.0                                       |
| 4              | Cntnap2 WT   | 44.868                           | 18.576                        | 36.556                       | 44.7                         | 19.598                        | 35.7                          | 97.8                           | 44.3                            | 26.1                                  | 26.587                        | 47.3                               | 36.0                                    | 73.6                                 | 10.0                                      | 11.0                                       | 17.0                                          | 28.0                                       |
| 5              | Cntnap2 WT   | 51.344                           | 18.598                        | 30.058                       | 44.9                         | 10.136                        | 45.0                          | 82.5                           | 91.1                            | 40.4                                  | 12.423                        | 47.2                               | 34.2                                    | 61.6                                 | 26.0                                      | 17.0                                       | 18.0                                          | 17.0                                       |
| 6              | Cntnap2 WT   | 42.519                           | 23.207                        | 34.275                       | 62.4                         | 7.169                         | 30.4                          | 136.1                          | 36.8                            | 32.2                                  | 8.64                          | 59.2                               | 45.8                                    | 114.6                                | 10.0                                      | 22.0                                       | 17.0                                          | 15.0                                       |
| 7              | Cntnap2 WT   | 50.49                            | 21.848                        | 27.662                       | 51.2                         | 7.478                         | 41.3                          | 145.7                          | 37.3                            | 42.4                                  | 6.507                         | 51.1                               | 80.4                                    | 98.0                                 | 15.0                                      | 16.0                                       | 11.0                                          | 12.0                                       |
| 8              | Cntnap2 WT   | 29.309                           | 20.126                        | 50.566                       | 45.6                         | 21.646                        | 32.8                          | 96.6                           | 57.0                            | 28.4                                  | 19.769                        | 51.8                               | 31.3                                    | 82.2                                 | 16.0                                      | 16.0                                       | 15.0                                          | 26.0                                       |
| 9              | Cntnap2 WT   | 29.068                           | 34.06                         | 36.872                       | 54.2                         | 15.495                        | 30.3                          | 126.1                          | 54.3                            | 33.8                                  | 18.585                        | 47.6                               | 42.6                                    | 82.2                                 | 22.0                                      | 17.0                                       | 12.0                                          | 16.0                                       |
| 10             | Cntnap2 WT   | 36.577                           | 18.866                        | 44.557                       | 57.3                         | 9.721                         | 33.0                          | 178.2                          | 62.7                            | 34.7                                  | 13.643                        | 51.6                               | 43.1                                    | 122.0                                | 17.0                                      | 13.0                                       | 15.0                                          | 15.0                                       |
| 11             | Cntnap2 WT   | 41.588                           | 29.247                        | 29.164                       | 50.7                         | 10.663                        | 38.6                          | 135.9                          | 59.8                            | 29.2                                  | 13.471                        | 57.3                               | 34.4                                    | 111.0                                | 20.0                                      | 14.0                                       | 18.0                                          | 28.0                                       |
| 12             | Cntnap2 WT   | 27.314                           | 29.141                        | 43.545                       | 50.5                         | 11.523                        | 37.9                          | 144.5                          | 67.5                            | 33.4                                  | 23.495                        | 43.1                               | 28.5                                    | 68.9                                 | 20.0                                      | 18.0                                       | 35.0                                          | 31.0                                       |
| 13             | Cntnap2 WT   | 25.545                           | 33.895                        | 40.56                        | 47.2                         | 17.601                        | 35.2                          | 110.8                          | 44.0                            | 30.3                                  | 15.172                        | 54.5                               | 42.3                                    | 141.5                                | 13.0                                      | 23.0                                       | 17.0                                          | 25.0                                       |
| 1              | Cntnap2 -/-  | 39.49                            | 25.22                         | 35.291                       | 39.8                         | 17.375                        | 42.8                          | 77.4                           | 19.7                            | 38.5                                  | 17.473                        | 44.1                               | 24.8                                    | 35.7                                 | 13.0                                      | 12.0                                       | 18.0                                          | 18.0                                       |
| 2              | Cntnap2 -/-  | 35.458                           | 29.446                        | 35.096                       | 42.3                         | 9.683                         | 48.0                          | 59.2                           | 33.9                            | 31.9                                  | 30.611                        | 37.5                               | 21.5                                    | 30.2                                 | 22.0                                      | 19.0                                       | 29.0                                          | 32.0                                       |
| 3              | Cntnap2 -/-  | 37.932                           | 23.109                        | 38.959                       | 31.3                         | 23.91                         | 44.8                          | 66.9                           | 27.4                            | 18.6                                  | 26.368                        | 55.0                               | 13.9                                    | 61.8                                 | 23.0                                      | 24.0                                       | 21.0                                          | 30.0                                       |
| 4              | Cntnap2 -/-  | 39.982                           | 38.894                        | 21.125                       | 43.1                         | 18.622                        | 38.3                          | 99.6                           | 58.2                            | 33.1                                  | 19.293                        | 47.6                               | 52.4                                    | 78.8                                 | 26.0                                      | 16.0                                       | 26.0                                          | 25.0                                       |
| 5              | Cntnap2 -/-  | 38.066                           | 25.468                        | 36.466                       | 48.0                         | 15.085                        | 36.9                          | 103.7                          | 47.4                            | 42.2                                  | 21.009                        | 36.8                               | 47.4                                    | 54.7                                 | 19.0                                      | 15.0                                       | 17.0                                          | 17.0                                       |
| 6              | Cntnap2 -/-  | 30.441                           | 34.596                        | 34.963                       | 53.1                         | 18.191                        | 28.8                          | 123.7                          | 26.1                            | 35.5                                  | 17.399                        | 47.1                               | 51.4                                    | 96.7                                 | 24.0                                      | 18.0                                       | 17.0                                          | 21.0                                       |
| 7              | Cntnap2 -/-  | 28.866                           | 34.509                        | 36.625                       | 46.5                         | 22.504                        | 31.0                          | 68.5                           | 28.5                            | 23.9                                  | 15.318                        | 60.8                               | 23.9                                    | 103.7                                | 12.0                                      | 15.0                                       | 14.0                                          | 18.0                                       |
| 8              | Cntnap2 -/-  | 44.815                           | 30.891                        | 24.295                       | 56.8                         | 15.296                        | 27.9                          | 143.4                          | 51.9                            | 51.2                                  | 21.255                        | 27.6                               | 55.3                                    | 36.7                                 | 13.0                                      | 10.0                                       | 16.0                                          | 14.0                                       |
| 9              | Cntnap2 -/-  | 38.199                           | 32.756                        | 29.045                       | 51.3                         | 17.831                        | 30.9                          | 97.2                           | 41.9                            | 41.3                                  | 15.621                        | 43.1                               | 34.6                                    | 63.1                                 | 28.0                                      | 26.0                                       | 18.0                                          | 20.0                                       |
| 10             | Cntnap2 -/-  | 35.631                           | 33.217                        | 31.153                       | 42.2                         | 17.711                        | 40.1                          | 77.2                           | 30.8                            | 33.7                                  | 23.133                        | 43.2                               | 20.6                                    | 43.1                                 | 25.0                                      | 22.0                                       | 33.0                                          | 39.0                                       |
| 11             | Cntnap2 -/-  | 36.841                           | 31.041                        | 32.118                       | 43.0                         | 26.753                        | 30.3                          | 50.2                           | 16.2                            | 35.5                                  | 36.949                        | 27.5                               | 12.5                                    | 22.0                                 | 49.0                                      | 37.0                                       | 38.0                                          | 30.0                                       |
| 12             | Cntnap2 -/-  | 38.162                           | 26.615                        | 35.223                       | 57.8                         | 12.611                        | 29.6                          | 142.5                          | 50.4                            | 31.9                                  | 19.968                        | 48.2                               | 48.0                                    | 78.7                                 | 21.0                                      | 19.0                                       | 29.0                                          | 36.0                                       |
| 13             | Cntnap2 -/-  | 31.041                           | 28.816                        | 40.143                       | 44.6                         | 21.518                        | 33.9                          | 118.1                          | 36.6                            | 30.1                                  | 16.897                        | 53.0                               | 46.5                                    | 106.9                                | 16.0                                      | 17.0                                       | 23.0                                          | 23.0                                       |
