# Supplementary material for: Comprehensive Analysis of the 16p11.2 Deletion and Null Cntnap2 Mouse Models of Autism Spectrum Disorder
Source: PubMed Central journal article supplement (PMC4537259; doi:10.1371/journal.pone.0134572), 2015-08-14
Supplement: pone.0134572.s046.pdf [file pone.0134572.s046.pdf]

| Reciprocal Social Interaction |              |                        |                           |                            |                        |                                       |                                          |                                        |                                            |                                               |                                             |                |        |                   |                    |                       |                           |                            |                        |                                       |                                          |                                        |                                            |                                               |                                             |                |        |                   |                    |                       |
|-------------------------------|--------------|------------------------|---------------------------|----------------------------|------------------------|---------------------------------------|------------------------------------------|----------------------------------------|--------------------------------------------|-----------------------------------------------|---------------------------------------------|----------------|--------|-------------------|--------------------|-----------------------|---------------------------|----------------------------|------------------------|---------------------------------------|------------------------------------------|----------------------------------------|--------------------------------------------|-----------------------------------------------|---------------------------------------------|----------------|--------|-------------------|--------------------|-----------------------|
| Number of mice                | Genotype     | SAME GENOTYPE STIMULUS |                           |                            |                        |                                       |                                          |                                        |                                            |                                               |                                             |                |        |                   | WILD TYPE STIMULUS |                       |                           |                            |                        |                                       |                                          |                                        |                                            |                                               |                                             |                |        |                   |                    |                       |
|                               |              | Total USV #            | Distance between subjects | Distance moved (both mice) | Time in 5 cm Proximity | Time nose-nose interaction (the pair) | Time nose-center interaction (both mice) | Time nose-tail interaction (both mice) | Frequency nose-nose interaction (the pair) | Frequency nose-center interaction (both mice) | Frequency nose-tail interaction (both mice) | Total approach | Follow | Active Social (%) | Passive Social (%) | Reciprocal Social (%) | Distance between subjects | Distance moved (both mice) | Time in 5 cm Proximity | Time nose-nose interaction (the pair) | Time nose-center interaction (both mice) | Time nose-tail interaction (both mice) | Frequency nose-nose interaction (the pair) | Frequency nose-center interaction (both mice) | Frequency nose-tail interaction (both mice) | Total approach | Follow | Active Social (%) | Passive Social (%) | Reciprocal Social (%) |
| 1                             | 16p11.2 WT   | 0                      | 13                        | 3924                       | 39                     | 40                                    | 31                                       | 38                                     | 48                                         | 36                                            | 65                                          | 5370           | 62     | 11.72             | 6.03               | 4.84                  | 15                        | 5125                       | 38                     | 46                                    | 27                                       | 61                                     | 55                                         | 47                                            | 88                                          | 6148           | 78     | 15.63             | 7.77               | 16.03                 |
| 2                             | 16p11.2 WT   | 0                      | 16                        | 3523                       | 23                     | 16                                    | 25                                       | 45                                     | 38                                         | 50                                            | 71                                          | 4687           | 54     | 13.30             | 9.48               | 3.91                  | 21                        | 6107                       | 18                     | 18                                    | 23                                       | 27                                     | 37                                         | 54                                            | 63                                          | 6969           | 85     | 9.09              | 4.78               | 4.71                  |
| 3                             | 16p11.2 WT   | 0                      | 15                        | 3055                       | 42                     | 56                                    | 29                                       | 81                                     | 24                                         | 36                                            | 89                                          | 4120           | 48     | 24.42             | 1.21               | 6.72                  | 16                        | 3428                       | 23                     | 25                                    | 18                                       | 53                                     | 29                                         | 27                                            | 56                                          | 4510           | 55     | 12.29             | 7.58               | 11.18                 |
| 4                             | 16p11.2 WT   | 2                      | 14                        | 2736                       | 40                     | 38                                    | 89                                       | 78                                     | 42                                         | 68                                            | 76                                          | 4234           | 48     | 26.17             | 9.35               | 11.56                 | 12                        | 4159                       | 47                     | 54                                    | 34                                       | 73                                     | 77                                         | 75                                            | 117                                         | 5964           | 67     | 21.83             | 4.13               | 16.03                 |
| 5                             | 16p11.2 WT   | 0                      | 20                        | 3978                       | 30                     | 28                                    | 12                                       | 58                                     | 46                                         | 42                                            | 77                                          | 4959           | 60     | 17.33             | 6.46               | 9.93                  | 16                        | 3353                       | 33                     | 49                                    | 21                                       | 62                                     | 51                                         | 43                                            | 67                                          | 4800           | 55     | 13.37             | 11.93              | 18.59                 |
| 6                             | 16p11.2 WT   | 0                      | 17                        | 3371                       | 24                     | 17                                    | 19                                       | 62                                     | 34                                         | 35                                            | 84                                          | 4748           | 53     | 14.23             | 5.96               | 9.67                  | 16                        | 4636                       | 31                     | 39                                    | 32                                       | 55                                     | 35                                         | 54                                            | 97                                          | 5757           | 69     | 11.54             | 13.98              | 14.79                 |
| 7                             | 16p11.2 WT   | 0                      | 16                        | 4724                       | 29                     | 29                                    | 29                                       | 55                                     | 43                                         | 56                                            | 82                                          | 5716           | 70     | 13.17             | 5.35               | 5.43                  | 18                        | 4331                       | 30                     | 60                                    | 21                                       | 46                                     | 41                                         | 44                                            | 67                                          | 5558           | 63     | 22.13             | 3.61               | 4.97                  |
| 8                             | 16p11.2 WT   | 0                      | 15                        | 3822                       | 25                     | 15                                    | 25                                       | 41                                     | 27                                         | 31                                            | 74                                          | 5268           | 60     | 6.31              | 18.02              | 10.03                 | 21                        | 3879                       | 15                     | 7                                     | 16                                       | 51                                     | 14                                         | 17                                            | 59                                          | 4733           | 60     | 11.28             | 1.53               | 1.37                  |
| 9                             | 16p11.2 WT   | 0                      | 13                        | 3683                       | 39                     | 34                                    | 28                                       | 48                                     | 33                                         | 56                                            | 90                                          | 5183           | 59     | 10.13             | 14.84              | 11.23                 | 17                        | 4975                       | 31                     | 41                                    | 24                                       | 38                                     | 60                                         | 50                                            | 77                                          | 6302           | 74     | 15.75             | 3.25               | 6.93                  |
| 10                            | 16p11.2 WT   | 4                      | 11                        | 4379                       | 54                     | 22                                    | 14                                       | 56                                     | 60                                         | 55                                            | 115                                         | 5791           | 65     | 9.54              | 16.78              | 10.78                 | 20                        | 4218                       | 24                     | 23                                    | 22                                       | 39                                     | 34                                         | 30                                            | 60                                          | 5427           | 65     | 13.32             | 5.73               | 4.04                  |
| 11                            | 16p11.2 WT   | 0                      | 14                        | 2486                       | 39                     | 28                                    | 21                                       | 54                                     | 42                                         | 25                                            | 58                                          | 3821           | 42     | 15.77             | 12.85              | 13.55                 | 14                        | 3828                       | 37                     | 34                                    | 38                                       | 49                                     | 56                                         | 63                                            | 89                                          | 5327           | 61     | 25.74             | 12.58              | 8.20                  |
| 12                            | 16p11.2 WT   | 0                      |                           |                            |                        |                                       |                                          |                                        |                                            |                                               |                                             |                |        | 7.59              | 3.24               | 4.40                  | 18                        | 5496                       | 20                     | 12                                    | 8                                        | 18                                     | 31                                         | 36                                            | 46                                          | 5977           | 78     | 4.88              | 8.29               | 5.53                  |
| 13                            | 16p11.2 WT   | 0                      | 15                        | 3593                       | 34                     | 33                                    | 33                                       | 63                                     | 33                                         | 50                                            | 92                                          | 4908           | 57     | 7.51              | 15.60              | 7.37                  | 16                        | 4137                       | 42                     | 32                                    | 26                                       | 79                                     | 37                                         | 46                                            | 93                                          | 5552           | 65     | 4.84              | 12.77              | 11.51                 |
| 14                            | 16p11.2 WT   | 0                      | 13                        | 4439                       | 47                     | 94                                    | 41                                       | 46                                     | 66                                         | 70                                            | 85                                          | 5430           | 64     | 12.34             | 10.72              | 16.97                 | 15                        | 3957                       | 40                     | 35                                    | 41                                       | 49                                     | 49                                         | 65                                            | 81                                          | 5392           | 66     | 14.74             | 14.88              | 19.56                 |
| 15                            | 16p11.2 WT   | 0                      | 20                        | 2982                       | 22                     | 31                                    | 29                                       | 41                                     | 30                                         | 42                                            | 53                                          | 4008           | 48     | 3.26              | 10.89              | 8.43                  | 16                        | 4785                       | 29                     | 44                                    | 53                                       | 54                                     | 58                                         | 59                                            | 89                                          | 5593           | 70     | 10.14             | 12.64              | 14.30                 |
| 16                            | 16p11.2 WT   | 0                      | 15                        | 4964                       | 35                     | 31                                    | 9                                        | 53                                     | 63                                         | 30                                            | 98                                          | 5849           | 71     | 25.48             | 2.63               | 18.94                 | 14                        | 5605                       | 39                     | 37                                    | 32                                       | 79                                     | 57                                         | 71                                            | 121                                         | 6515           | 85     | 29.88             | 4.20               | 17.32                 |
| 1                             | 16p11.2 df/+ | 2                      | 13                        | 3883                       | 37                     | 23                                    | 56                                       | 58                                     | 35                                         | 67                                            | 87                                          | 5121           | 59     | 10.37             | 5.35               | 6.22                  | 8                         | 4946                       | 60                     | 78                                    | 65                                       | 93                                     | 82                                         | 108                                           | 133                                         | 6100           | 76     | 19.42             | 15.09              | 17.95                 |
| 2                             | 16p11.2 df/+ | 0                      | 15                        | 2955                       | 31                     | 28                                    | 34                                       | 40                                     | 41                                         | 50                                            | 68                                          | 4288           | 47     | 10.92             | 6.88               | 4.74                  | 12                        | 4970                       | 40                     | 38                                    | 39                                       | 48                                     | 75                                         | 62                                            | 79                                          | 5769           | 75     | 27.04             | 5.53               | 13.19                 |
| 3                             | 16p11.2 df/+ | 1                      | 11                        | 3700                       | 32                     | 30                                    | 19                                       | 56                                     | 42                                         | 41                                            | 85                                          | 4835           | 54     | 13.66             | 13.57              | 4.74                  | 16                        | 4331                       | 18                     | 8                                     | 13                                       | 37                                     | 19                                         | 42                                            | 81                                          | 5636           | 65     | 21.19             | 2.80               | 3.71                  |
| 4                             | 16p11.2 df/+ | 0                      | 11                        | 2409                       | 57                     | 55                                    | 51                                       | 107                                    | 42                                         | 57                                            | 127                                         | 3581           | 39     | 12.40             | 20.01              | 14.87                 | 17                        | 5499                       | 26                     | 28                                    | 21                                       | 43                                     | 49                                         | 47                                            | 67                                          | 6831           | 80     | 10.13             | 7.99               | 6.22                  |
| 5                             | 16p11.2 df/+ | 5                      | 10                        | 4126                       | 46                     | 41                                    | 47                                       | 88                                     | 52                                         | 70                                            | 123                                         | 5547           | 63     | 28.57             | 6.74               | 9.99                  | 14                        | 5605                       | 32                     | 31                                    | 25                                       | 57                                     | 45                                         | 64                                            | 115                                         | 7156           | 86     | 22.16             | 7.16               | 8.95                  |
| 6                             | 16p11.2 df/+ | 0                      | 14                        | 2897                       | 42                     | 42                                    | 56                                       | 122                                    | 45                                         | 73                                            | 81                                          | 4252           | 48     | 7.43              | 9.75               | 15.57                 | 12                        | 4660                       | 53                     | 36                                    | 10                                       | 35                                     | 44                                         | 28                                            | 77                                          | 5660           | 70     | 17.15             | 6.98               | 5.86                  |
| 7                             | 16p11.2 df/+ | 0                      | 15                        | 3277                       | 39                     | 42                                    | 38                                       | 64                                     | 58                                         | 57                                            | 83                                          | 4719           | 54     | 17.52             | 5.29               | 15.88                 | 18                        | 4011                       | 27                     | 49                                    | 35                                       | 53                                     | 52                                         | 61                                            | 88                                          | 5750           | 65     | 11.23             | 5.41               | 16.93                 |
| 8                             | 16p11.2 df/+ | 0                      | 19                        | 3640                       | 24                     | 14                                    | 12                                       | 31                                     | 23                                         | 26                                            | 47                                          | 5132           | 58     | 7.00              | 7.28               | 8.54                  | 14                        | 4451                       | 26                     | 17                                    | 7                                        | 39                                     | 22                                         | 26                                            | 76                                          | 5430           | 65     | 6.62              | 11.72              | 9.32                  |
| 9                             | 16p11.2 df/+ | 0                      | 15                        | 4607                       | 38                     | 36                                    | 29                                       | 68                                     | 44                                         | 41                                            | 117                                         | 5826           | 67     | 10.84             | 11.89              | 7.74                  | 21                        | 4407                       | 23                     | 30                                    | 20                                       | 44                                     | 34                                         | 36                                            | 55                                          | 5657           | 68     | 13.94             | 6.44               | 10.20                 |
| 10                            | 16p11.2 df/+ | 4                      | 15                        | 4023                       | 32                     | 29                                    | 23                                       | 41                                     | 39                                         | 51                                            | 83                                          | 5854           | 66     | 15.31             | 7.55               | 5.40                  | 12                        | 4410                       | 50                     | 64                                    | 56                                       | 102                                    | 99                                         | 113                                           | 131                                         | 5831           | 68     | 33.83             | 10.74              | 13.62                 |
| 11                            | 16p11.2 df/+ | 6                      | 13                        | 3754                       | 37                     | 25                                    | 41                                       | 71                                     | 57                                         | 76                                            | 92                                          | 4966           | 56     | 10.26             | 13.03              | 6.36                  | 12                        | 5154                       | 35                     | 25                                    | 22                                       | 59                                     | 49                                         | 68                                            | 127                                         | 6340           | 79     | 22.64             | 10.75              | 13.72                 |
| 12                            | 16p11.2 df/+ | 0                      | 12                        | 3347                       | 41                     | 37                                    | 19                                       | 85                                     | 45                                         | 41                                            | 94                                          | 4730           | 52     | 11.60             | 18.84              | 7.46                  | 18                        | 4202                       | 29                     | 14                                    | 19                                       | 55                                     | 22                                         | 46                                            | 82                                          | 5495           | 64     | 6.82              | 8.62               | 5.41                  |
| 13                            | 16p11.2 df/+ | 0                      | 14                        | 3957                       | 35                     | 46                                    | 17                                       | 52                                     | 46                                         | 53                                            | 93                                          | 5700           | 65     | 14.88             | 7.52               | 10.56                 | 17                        | 5534                       | 30                     | 15                                    | 42                                       | 50                                     | 41                                         | 70                                            | 105                                         | 6768           | 80     | 19.10             | 6.65               | 5.89                  |
| 14                            | 16p11.2 df/+ | 1                      | 9                         | 2276                       | 58                     | 31                                    | 46                                       | 60                                     | 43                                         | 35                                            | 76                                          | 3782           | 43     | 10.39             | 16.42              | 16.00                 | 14                        | 4409                       | 40                     | 36                                    | 12                                       | 39                                     | 57                                         | 37                                            | 67                                          | 5893           | 70     | 18.24             | 7.58               | 15.48                 |
| 15                            | 16p11.2 df/+ | 0                      | 13                        | 3187                       | 44                     | 51                                    | 80                                       | 100                                    | 49                                         | 84                                            | 116                                         | 4569           | 52     | 19.97             | 14.18              | 9.55                  | 14                        | 4605                       | 45                     | 46                                    | 62                                       | 80                                     | 63                                         | 113                                           | 160                                         | 5804           | 69     | 23.77             | 1.31               | 11.86                 |
| 16                            | 16p11.2 df/+ | 1                      | 15                        | 3865                       | 42                     | 47                                    | 46                                       | 88                                     | 55                                         | 75                                            | 121                                         | 5249           | 61     | 25.88             | 5.72               | 11.36                 | 18                        | 4345                       | 26                     | 46                                    | 29                                       | 41                                     | 54                                         | 50                                            | 83                                          | 5443           | 65     | 24.64             | 2.33               | 4.19                  |
| 1                             | Cntnap2 WT   | 1                      | 17                        | 5625                       | 30                     | 22                                    | 36                                       | 38                                     | 46                                         | 79                                            | 83                                          | 6656           | 79     | 9.10              | 8.24               | 7.78                  | 16                        | 5202                       | 30                     | 26                                    | 19                                       | 53                                     | 41                                         | 35                                            | 88                                          | 6496           | 76     | 12.66             | 6.02               | 6.97                  |
| 2                             | Cntnap2 WT   | 2                      | 16                        | 3955                       | 30                     | 39                                    | 26                                       | 34                                     | 49                                         | 51                                            | 66                                          | 5243           | 60     | 13.28             | 7.17               | 7.82                  | 15                        | 4070                       | 41                     | 47                                    | 48                                       | 67                                     | 46                                         | 50                                            | 84                                          | 5208           | 61     | 12.48             | 11.95              | 11.36                 |
| 3                             | Cntnap2 WT   | 0                      | 19                        | 5129                       | 16                     | 11                                    | 14                                       | 25                                     | 22                                         | 39                                            | 53                                          | 6265           | 74     | 4.23              | 6.36               | 3.38                  | 15                        | 5792                       | 31                     | 30                                    | 37                                       | 47                                     | 61                                         | 83                                            | 108                                         | 7185           | 85     | 12.81             | 10.16              | 6.59                  |
| 4                             | Cntnap2 WT   | 0                      | 17                        | 3945                       | 28                     | 14                                    | 40                                       | 40                                     | 24                                         | 52                                            | 76                                          | 5196           | 59     | 15.93             | 5.13               | 4.53                  | 18                        | 6565                       | 25                     | 21                                    | 11                                       | 35                                     | 50                                         | 38                                            | 60                                          | 7123           | 91     | 3.99              | 5.37               | 5.67                  |
| 5                             | Cntnap2 WT   | 5                      | 13                        | 5199                       | 48                     | 59                                    | 14                                       | 42                                     | 80                                         | 51                                            | 106                                         | 6474           | 77     | 36.20             | 7.34               | 7.32                  | 8                         | 5353                       | 61                     | 56                                    | 39                                       | 69                                     | 106                                        | 104                                           | 161                                         | 6848           | 80     | 45.66             | 6.10               | 13.90                 |
| 6                             | Cntnap2 WT   | 0                      | 17                        | 6255                       | 17                     | 14                                    | 20                                       | 25                                     | 32                                         | 56                                            | 77                                          | 7232           | 84     | 16.56             | 3.88               | 3.94                  | 15                        | 6790                       | 31                     | 32                                    | 15                                       | 49                                     | 61                                         | 48                                            | 108                                         | 7939           | 98     | 25.52             | 1.24               | 6.87                  |
| 7                             | Cntnap2 WT   | 0                      | 18                        | 6559                       | 19                     | 21                                    | 26                                       | 42                                     | 59                                         | 62                                            | 88                                          | 7320           | 90     | 15.86             | 8.21               | 5.98                  | 14                        | 4825                       | 45                     | 69                                    | 30                                       | 80                                     | 75                                         | 74                                            | 110                                         | 6102           | 70     | 21.90             | 7.01               | 11.72                 |
| 8                             | Cntnap2 WT   | 1                      | 13                        | 4746                       | 33                     | 25                                    | 32                                       | 54                                     | 47                                         | 56                                            | 102                                         | 5888           | 67     | 16.22             | 5.68               | 5.77                  | 17                        | 5795                       | 32                     | 28                                    | 27                                       | 41                                     | 65                                         | 71                                            | 107                                         | 6723           | 85     | 25.51             | 1.82               | 11.42                 |
| 9                             | Cntnap2 WT   | 0                      | 15                        | 6235                       | 30                     | 24                                    | 43                                       | 56                                     | 52                                         | 85                                            | 119                                         | 7283           | 89     | 9.98              | 6.50               | 9.91                  | 15                        | 5859                       | 33                     | 23                                    | 48                                       | 57                                     | 60                                         | 66                                            | 113                                         | 6603           | 81     | 15.15             | 6.51               | 13.74                 |
| 10                            | Cntnap2 WT   | 0                      | 16                        | 6095                       | 30                     | 23                                    | 33                                       | 42                                     | 47                                         | 57                                            | 101                                         | 6860           | 80     | 12.31             | 9.10               | 6.10                  | 16                        | 5963                       | 30                     | 20                                    | 27                                       | 40                                     | 54                                         | 68                                            | 86                                          | 7019           | 85     | 14.85             | 2.83               | 4.48                  |
| 11                            | Cntnap2 WT   | 2                      | 17                        | 5332                       | 25                     | 16                                    | 37                                       | 48                                     | 35                                         | 58                                            | 99                                          | 6693           | 76     | 24.18             | 1.45               | 4.68                  | 18                        | 5038                       | 24                     | 19                                    | 20                                       | 32                                     | 48                                         | 50                                            | 75                                          | 6363           | 75     | 13.20             | 4.66               | 6.35                  |
| 12                            | Cntnap2 WT   | 0                      | 19                        | 5924                       | 23                     | 13                                    | 26                                       | 38                                     | 33                                         | 51                                            | 94                                          | 6885           | 82     | 15.06             | 7.60               | 4.62                  | 20                        | 7158                       | 21                     | 19                                    | 23                                       | 27                                     | 45                                         | 65                                            | 88                                          | 7537           | 99     | 21.22             | 4.35               | 3.41                  |
| 13                            | Cntnap2 WT   | 0                      | 16                        | 4541                       | 32                     | 24                                    | 32                                       | 67                                     | 36                                         | 62                                            | 128                                         | 5635           | 66     | 19.32             | 5.14               | 8.11                  | 19                        | 7274                       | 29                     | 38                                    | 13                                       | 31                                     | 73                                         | 53                                            | 90                                          | 7987           | 103    | 17.28             | 11.91              | 10.84                 |
| 14                            | Cntnap2 WT   | 0                      | 15                        | 4748                       | 36                     | 21                                    | 49                                       | 61                                     | 49                                         | 76                                            | 97                                          | 5621           | 67     | 13.17             | 12.60              | 6.26                  | 20                        | 5852                       | 16                     | 16                                    | 25                                       | 22                                     | 34                                         | 49                                            | 63                                          | 6758           | 82     | 5.99              | 3.88               | 3.07                  |
| 15                            | Cntnap2 WT   | 18                     |                           |                            |                        |                                       |                                          |                                        |                                            |                                               |                                             |                |        |                   |                    |                       | 18                        | 5578                       | 16                     | 17                                    | 19                                       | 19                                     | 40                                         | 51                                            | 59                                          | 6701           | 81     | 8.49              | 3.02               | 6.69                  |
| 16                            | Cntnap2 WT   | 20                     |                           |                            |                        |                                       |                                          |                                        |                                            |                                               |                                             |                |        |                   |                    |                       | 20                        | 4106                       | 25                     | 17                                    | 18                                       | 44                                     | 25                                         | 36                                            | 57                                          | 5268           | 62     | 12.64             | 5.06               | 6.39                  |
| 1                             | Cntnap2 -/-  | 0                      | 16                        | 5169                       | 32                     | 28                                    | 39                                       | 44                                     | 53                                         | 69                                            | 99                                          | 6269           | 71     | 26                |                    |                       |                           |                            |                        |                                       |                                          |                                        |                                            |                                               |                                             |                |        |                   |                    |                       |
