# Supplementary material for: Comprehensive Analysis of the 16p11.2 Deletion and Null Cntnap2 Mouse Models of Autism Spectrum Disorder
Source: PubMed Central journal article supplement (PMC4537259; doi:10.1371/journal.pone.0134572), 2015-08-14
Supplement: pone.0134572.s047.pdf [file pone.0134572.s047.pdf]

| Urine Open Field Test |              |                                         |                                         |                               |                               |                                    |                                    |                    |                            |                              |                       |                               |                                 |                      |
|-----------------------|--------------|-----------------------------------------|-----------------------------------------|-------------------------------|-------------------------------|------------------------------------|------------------------------------|--------------------|----------------------------|------------------------------|-----------------------|-------------------------------|---------------------------------|----------------------|
| Number of mice        | Genotype     | Total Distance Traveled (cm) - Baseline | Total Distance Traveled (cm) - Exposure | Time in Center (%) - Baseline | Time in Center (%) - Exposure | Distance in Center (cm) - Baseline | Distance in Center (cm) - Exposure | Marking Baseline # | Marking Exposure Session # | Marking Exposure in Center # | Marking Baseline Area | Marking Exposure Session Area | Marking Exposure in Center Area | Total Exposure USV # |
| 1                     | 16p11.2 WT   | 2859.4                                  | 626.9                                   | 1.2                           | 9.8                           | 162.6                              | 108.1                              | 0                  | 1                          | 0                            | 0                     | 11097                         | 0                               | 5                    |
| 2                     | 16p11.2 WT   | 7310.4                                  | 908.4                                   | 12.2                          | 16.8                          | 1658.4                             | 153.1                              | 1                  | 2                          | 1                            | 5978                  | 46388                         | 1214                            | 25                   |
| 3                     | 16p11.2 WT   | 81234.4                                 | 580.9                                   | 15.3                          | 5.0                           | 5228.2                             | 8.9                                | 30                 | 12                         | 0                            | 312113                | 32925                         | 0                               | 1                    |
| 4                     | 16p11.2 WT   | 4733.6                                  | 629.8                                   | 3.8                           | 23.8                          | 904.7                              | 161.6                              | 25                 | 5                          | 1                            | 121398                | 18545                         | 2857                            | 28                   |
| 5                     | 16p11.2 WT   | 131527.5                                | 599.3                                   | 1.8                           | 11.9                          | 2749.5                             | 130.9                              | 4                  | 3                          | 2                            | 122947                | 9458                          | 2719                            | 0                    |
| 6                     | 16p11.2 WT   | 75785.3                                 | 538.4                                   | 13.9                          | 15.9                          | 14255.8                            | 95.9                               | 32                 | 53                         | 5                            | 376465                | 278514                        | 57664                           | 0                    |
| 7                     | 16p11.2 WT   | 2905.0                                  | 583.4                                   | 1.1                           | 10.0                          | 292.3                              | 88.0                               | 23                 | 9                          | 0                            | 385785                | 15241                         | 0                               | 288                  |
| 8                     | 16p11.2 WT   | 5116.5                                  | 1034.1                                  | 4.3                           | 18.0                          | 516.6                              | 227.2                              | 4                  | 7                          | 4                            | 16795                 | 21571                         | 10581                           | 4                    |
| 9                     | 16p11.2 WT   | 34767.4                                 | 821.4                                   | 5.1                           | 6.6                           | 4355.2                             | 28.9                               | 108                | 38                         | 4                            | 1074058               | 85948                         | 5987                            | 56                   |
| 10                    | 16p11.2 WT   | 2327.8                                  | 429.9                                   | 2.1                           | 10.0                          | 570.7                              | 62.4                               | 2                  | 2                          | 0                            | 8701                  | 9857                          | 0                               | 0                    |
| 11                    | 16p11.2 WT   | 2273.9                                  | 524.7                                   | 0.6                           | 18.8                          | 134.3                              | 103.8                              | 7                  | 3                          | 0                            | 13902                 | 18473                         | 0                               | 0                    |
| 12                    | 16p11.2 WT   | 7015.9                                  | 1158.7                                  | 8.5                           | 13.7                          | 1965.6                             | 237.1                              | 25                 | 3                          | 0                            | 100212                | 9783                          | 0                               | 145                  |
| 13                    | 16p11.2 WT   | 3617.5                                  | 622.6                                   | 4.9                           | 10.8                          | 1005.0                             | 101.2                              | 8                  | 2                          | 0                            | 149427                | 12905                         | 0                               | 13                   |
| 14                    | 16p11.2 WT   | 4165.3                                  | 678.8                                   | 3.1                           | 12.1                          | 713.9                              | 144.9                              | 9                  | 6                          | 3                            | 108112                | 18814                         | 8118                            | 13                   |
| 15                    | 16p11.2 WT   | 7250.5                                  | 941.2                                   | 6.9                           | 16.9                          | 2480.5                             | 272.7                              | 26                 | 3                          | 0                            | 107696                | 7766                          | 0                               | 20                   |
| 16                    | 16p11.2 WT   | 9443.0                                  | 1179.6                                  | 9.1                           | 8.6                           | 2112.0                             | 175.0                              | 45                 | 53                         | 6                            | 208896                | 120821                        | 13896                           | 586                  |
| 1                     | 16p11.2 df/+ | 5546.8                                  | 1373.5                                  | 24.3                          | 23.2                          | 2253.0                             | 520.1                              | 4                  | 11                         | 1                            | 64777                 | 39517                         | 1578                            | 32                   |
| 2                     | 16p11.2 df/+ | 842.4                                   | 511.5                                   | 0.1                           | 5.2                           | 61.3                               | 37.6                               | 4                  | 21                         | 0                            | 289592                | 222585                        | 0                               | 0                    |
| 3                     | 16p11.2 df/+ | 45127.5                                 | 1286.2                                  | 43.3                          | 19.5                          | 12664.1                            | 376.0                              | 37                 | 79                         | 4                            | 251987                | 209537                        | 6610                            | 164                  |
| 4                     | 16p11.2 df/+ | 6143.2                                  | 730.1                                   | 7.6                           | 12.7                          | 1512.6                             | 128.6                              | 2                  | 13                         | 2                            | 16561                 | 45806                         | 5494                            | 51                   |
| 5                     | 16p11.2 df/+ | 49129.5                                 | 1180.2                                  | 29.1                          | 20.1                          | 16854.4                            | 324.3                              | 1                  | 6                          | 2                            | 8925                  | 17451                         | 7022                            | 32                   |
| 6                     | 16p11.2 df/+ | 2488.4                                  | 583.3                                   | 2.8                           | 10.2                          | 288.1                              | 63.7                               | 5                  | 23                         | 1                            | 92926                 | 112780                        | 2839                            | 246                  |
| 7                     | 16p11.2 df/+ | 59936.8                                 | 1103.4                                  | 15.3                          | 15.9                          | 5790.5                             | 322.9                              | 10                 | 3                          | 1                            | 92565                 | 19141                         | 4506                            | 0                    |
| 8                     | 16p11.2 df/+ | 4145.6                                  | 649.4                                   | 4.3                           | 15.0                          | 776.3                              | 101.6                              | 45                 | 38                         | 2                            | 318064                | 168055                        | 6942                            | 0                    |
| 9                     | 16p11.2 df/+ | 46555.7                                 | 1132.8                                  | 27.9                          | 11.8                          | 11575.8                            | 151.9                              | 59                 | 67                         | 9                            | 257712                | 200488                        | 42417                           | 300                  |
| 10                    | 16p11.2 df/+ | 30243.0                                 | 1018.7                                  | 2.5                           | 8.8                           | 3356.0                             | 47.0                               | 11                 | 5                          | 0                            | 39848                 | 29981                         | 0                               | 162                  |
| 11                    | 16p11.2 df/+ | 32541.3                                 | 755.4                                   | 40.0                          | 20.8                          | 10147.9                            | 122.8                              | 3                  | 4                          | 1                            | 73848                 | 11023                         | 1631                            | 713                  |
| 12                    | 16p11.2 df/+ | 3806.0                                  | 600.8                                   | 3.9                           | 15.2                          | 517.7                              | 145.6                              | 30                 | 8                          | 1                            | 102823                | 13906                         | 1229                            | 12                   |
| 13                    | 16p11.2 df/+ | 7386.4                                  | 988.1                                   | 19.2                          | 17.4                          | 2654.2                             | 103.8                              | 101                | 15                         | 1                            | 673422                | 36190                         | 1254                            | 0                    |
| 14                    | 16p11.2 df/+ | 8787.3                                  | 932.8                                   | 10.2                          | 19.5                          | 2418.2                             | 258.7                              | 68                 | 2                          | 0                            | 325620                | 16221                         | 0                               | 20                   |
| 15                    | 16p11.2 df/+ | 8750.5                                  | 1102.8                                  | 32.0                          | 26.9                          | 3702.6                             | 371.4                              | 69                 | 24                         | 1                            | 516193                | 49085                         | 1678                            | 662                  |
| 16                    | 16p11.2 df/+ | 5424.0                                  | 934.4                                   | 4.3                           | 14.2                          | 893.7                              | 173.2                              | 14                 | 1                          | 0                            | 62736                 | 15416                         | 0                               | 9                    |
| 1                     | Cntnap2 WT   | 8515.5                                  | 1215.6                                  | 15.0                          | 11.1                          | 2485.1                             | 280.2                              | 25                 | 47                         | 0                            | 226109                | 171955                        | 0                               | 0                    |
| 2                     | Cntnap2 WT   | 52851.7                                 | 982.3                                   | 15.6                          | 13.5                          | 12107.4                            | 165.7                              | 20                 | 11                         | 0                            | 100682                | 67168                         | 0                               | 6                    |
| 3                     | Cntnap2 WT   | 8253.5                                  | 836.4                                   | 16.0                          | 26.6                          | 2322.5                             | 167.6                              | 2                  | 13                         | 0                            | 11831                 | 34756                         | 0                               | 992                  |
| 4                     | Cntnap2 WT   | 9446.4                                  | 1081.0                                  | 18.2                          | 24.4                          | 2735.2                             | 218.2                              | 3                  | 10                         | 1                            | 41491                 | 53239                         | 1450                            | 756                  |
| 5                     | Cntnap2 WT   | 11398.0                                 | 961.9                                   | 14.2                          | 22.0                          | 3488.8                             | 211.6                              | 16                 | 84                         | 2                            | 284207                | 291805                        | 7787                            | 1127                 |
| 6                     | Cntnap2 WT   | 10359.6                                 | 954.8                                   | 17.3                          | 15.8                          | 2578.1                             | 143.9                              | 58                 | 105                        | 5                            | 885833                | 571327                        | 7417                            | 59                   |
| 7                     | Cntnap2 WT   | 13098.2                                 | 991.4                                   | 22.1                          | 17.7                          | 3885.4                             | 138.0                              | 47                 | 54                         | 6                            | 344521                | 186756                        | 16980                           | 568                  |
| 8                     | Cntnap2 WT   | 8394.3                                  | 1485.5                                  | 23.2                          | 31.4                          | 2935.4                             | 378.7                              | 74                 | 103                        | 11                           | 437667                | 242529                        | 18004                           | 268                  |
| 9                     | Cntnap2 WT   | 8300.4                                  | 873.1                                   | 8.7                           | 13.3                          | 1585.5                             | 128.6                              | 21                 | 2                          | 1                            | 177508                | 4687                          | 2529                            | 429                  |
| 10                    | Cntnap2 WT   | 56454.1                                 | 1146.7                                  | 26.3                          | 25.3                          | 10538.2                            | 266.9                              | 14                 | 18                         | 3                            | 54606                 | 54622                         | 13022                           | 775                  |
| 11                    | Cntnap2 WT   | 8043.7                                  | 806.1                                   | 13.9                          | 21.5                          | 2090.0                             | 251.3                              | 101                | 12                         | 1                            | 643797                | 23141                         | 1044                            | 40                   |
| 12                    | Cntnap2 WT   | 54701.0                                 | 557.3                                   | 18.7                          | 16.3                          | 13692.3                            | 115.5                              | 60                 | 13                         | 3                            | 594134                | 29459                         | 5246                            | 549                  |
| 13                    | Cntnap2 WT   | 13154.8                                 | 727.3                                   | 10.6                          | 12.5                          | 3054.3                             | 127.2                              | 131                | 16                         | 0                            | 658898                | 40345                         | 0                               | 9                    |
| 14                    | Cntnap2 WT   | 50495.2                                 | 988.9                                   | 32.2                          | 14.2                          | 11338.8                            | 119.6                              | 50                 | 8                          | 3                            | 253214                | 34604                         | 6005                            | 937                  |
| 15                    | Cntnap2 WT   | 8773.5                                  | 1079.7                                  | 14.8                          | 12.2                          | 2071.0                             | 60.9                               | 25                 | 4                          | 0                            | 143830                | 7950                          | 0                               | 747                  |
| 16                    | Cntnap2 WT   | 46111.7                                 | 904.3                                   | 12.4                          | 9.3                           | 11421.7                            | 131.8                              | 0                  | 4                          | 0                            | 0                     | 12581                         | 0                               | 3                    |
| 1                     | Cntnap2 -/-  | 7749.4                                  | 1182.2                                  | 13.4                          | 15.2                          | 2027.6                             | 130.2                              | 33                 | 46                         | 3                            | 344997                | 174615                        | 24122                           | 203                  |
| 2                     | Cntnap2 -/-  | 14318.2                                 | 1232.9                                  | 22.1                          | 28.7                          | 4759.6                             | 331.1                              | 4                  | 16                         | 3                            | 73351                 | 69515                         | 9056                            | 4                    |
| 3                     | Cntnap2 -/-  | 9871.5                                  | 1239.3                                  | 35.6                          | 15.1                          | 3814.5                             | 214.2                              | 3                  | 11                         | 1                            | 10788                 | 43041                         | 5187                            | 92                   |
| 4                     | Cntnap2 -/-  | 10949.1                                 | 1198.9                                  | 14.9                          | 22.5                          | 2980.7                             | 217.3                              | 2                  | 1                          | 0                            | 19163                 | 7067                          | 0                               | 26                   |
| 5                     | Cntnap2 -/-  | 10762.2                                 | 1271.0                                  | 22.1                          | 24.1                          | 3641.6                             | 280.4                              | 3                  | 5                          | 0                            | 6297                  | 15605                         | 0                               | 1                    |
| 6                     | Cntnap2 -/-  | 11674.2                                 | 1316.0                                  | 9.1                           | 10.2                          | 2356.1                             | 145.9                              | 47                 | 23                         | 3                            | 303773                | 53495                         | 4342                            | 0                    |
| 7                     | Cntnap2 -/-  | 8483.5                                  | 1406.8                                  | 14.0                          | 18.3                          | 2229.8                             | 232.8                              | 70                 | 74                         | 4                            | 402126                | 437667                        | 10572                           | 562                  |
| 8                     | Cntnap2 -/-  | 12618.7                                 | 1409.2                                  | 14.4                          | 8.9                           | 3045.6                             | 179.5                              | 7                  | 2                          | 1                            | 105071                | 5589                          | 1223                            | 191                  |
| 9                     | Cntnap2 -/-  | 12236.2                                 | 1332.7                                  | 15.4                          | 7.7                           | 3372.6                             | 241.1                              | 12                 | 3                          | 0                            | 70741                 | 12135                         | 0                               | 32                   |
| 10                    | Cntnap2 -/-  | 9979.3                                  | 1201.8                                  | 10.4                          | 22.6                          | 2678.0                             | 322.0                              | 0                  | 1                          | 0                            | 0                     | 8148                          | 0                               | 538                  |
| 11                    | Cntnap2 -/-  | 5837.2                                  | 1269.1                                  | 11.2                          | 19.0                          | 1514.6                             | 295.8                              | 10                 | 2                          | 0                            | 44031                 | 8157                          | 0                               | 0                    |
| 12                    | Cntnap2 -/-  | 8807.6                                  | 1324.3                                  | 12.3                          | 16.8                          | 2265.2                             | 200.1                              | 29                 | 31                         | 3                            | 201255                | 126231                        | 5423                            | 10                   |
| 13                    | Cntnap2 -/-  |                                         | 1220.7                                  |                               | 18.1                          |                                    | 176.6                              | 12                 | 21                         | 1                            | 108099                | 77190                         | 11783                           | 593                  |
| 14                    | Cntnap2 -/-  | 44513.6                                 | 1255.6                                  | 27.7                          | 7.9                           | 9369.9                             | 237.2                              | 17                 | 6                          | 1                            | 111629                | 12984                         | 1398                            | 0                    |
| 15                    | Cntnap2 -/-  | 47513.4                                 | 1169.4                                  | 16.8                          | 15.8                          | 11698.0                            | 196.7                              | 13                 | 3                          | 0                            | 29726                 | 10844                         | 0                               | 29                   |
| 16                    | Cntnap2 -/-  | 13393.6                                 | 989.0                                   | 16.3                          | 13.5                          | 3448.0                             | 86.4                               | 50                 | 6                          | 1                            | 261081                | 10483                         | 1277                            | 155                  |
