# Supplementary material for: Comprehensive Analysis of the 16p11.2 Deletion and Null Cntnap2 Mouse Models of Autism Spectrum Disorder
Source: PubMed Central journal article supplement (PMC4537259; doi:10.1371/journal.pone.0134572), 2015-08-14
Supplement: pone.0134572.s048.pdf [file pone.0134572.s048.pdf]

| T-Maze         |              |                                 |                              |                            |                            |                            |                            |                            |                            |  |
|----------------|--------------|---------------------------------|------------------------------|----------------------------|----------------------------|----------------------------|----------------------------|----------------------------|----------------------------|--|
| Number of mice | Genotype     | Acquisition - Days to Criterion | Reversal - Days to Criterion | Reversal - % Correct Day 1 | Reversal - % Correct Day 2 | Reversal - % Correct Day 3 | Reversal - % Correct Day 4 | Reversal - % Correct Day 5 | Reversal - % Correct Day 6 |  |
| 1              | 16p11.2 WT   | 3                               | 3                            | 75                         | 75                         | 100                        | 100                        | 100                        | 100                        |  |
| 2              | 16p11.2 WT   | 2                               | 2                            | 62.5                       | 100                        | 100                        | 100                        | 87.5                       | 87.5                       |  |
| 3              | 16p11.2 WT   | 2                               | 3                            | 37.5                       | 37.5                       | 50                         | 87.5                       | 62.5                       | 100                        |  |
| 4              | 16p11.2 WT   | 3                               | 3                            | 25                         | 25                         | 87.5                       | 100                        | 87.5                       | 100                        |  |
| 5              | 16p11.2 WT   | 3                               | 4                            | 12.5                       | 87.5                       | 100                        | 100                        | 100                        | 100                        |  |
| 6              | 16p11.2 WT   | 3                               | 3                            | 25                         | 75                         | 100                        | 100                        | 100                        | 100                        |  |
| 7              | 16p11.2 WT   | 5                               | 6                            | 25                         | 87.5                       | 100                        | 100                        | 100                        | 100                        |  |
| 8              | 16p11.2 WT   | 3                               | 4                            | 37.5                       | 87.5                       | 100                        | 100                        | 100                        | 100                        |  |
| 9              | 16p11.2 WT   | 4                               | 3                            | 50                         | 100                        | 100                        | 100                        | 100                        | 100                        |  |
| 10             | 16p11.2 WT   | 3                               | 2                            | 37.5                       | 75                         | 100                        | 100                        | 100                        | 100                        |  |
| 11             | 16p11.2 WT   | 3                               | 3                            | 87.5                       | 62.5                       | 100                        | 100                        | 100                        | 100                        |  |
| 12             | 16p11.2 WT   | 3                               | 3                            | 50                         | 100                        | 87.5                       | 100                        | 100                        | 100                        |  |
| 13             | 16p11.2 WT   | 3                               | 5                            | 37.5                       | 87.5                       | 100                        | 100                        | 100                        | 100                        |  |
| 14             | 16p11.2 WT   |                                 |                              | 12.5                       | 100                        | 87.5                       | 100                        | 100                        | 100                        |  |
| 15             | 16p11.2 WT   | 3                               | 3                            | 25                         | 100                        | 87.5                       | 100                        | 100                        | 100                        |  |
| 16             | 16p11.2 WT   | 7                               |                              | 75                         | 100                        | 100                        | 100                        | 100                        | 100                        |  |
| 1              | 16p11.2 df/+ | 2                               | 3                            | 37.5                       | 87.5                       | 100                        | 100                        | 100                        | 100                        |  |
| 2              | 16p11.2 df/+ | 2                               | 3                            | 37.5                       | 75                         | 100                        | 100                        | 100                        | 100                        |  |
| 3              | 16p11.2 df/+ | 3                               | 3                            | 75                         | 100                        | 100                        | 100                        | 100                        | 100                        |  |
| 4              | 16p11.2 df/+ | 2                               | 3                            | 50                         | 100                        | 100                        | 100                        | 100                        | 100                        |  |
| 5              | 16p11.2 df/+ | 3                               | 3                            | 12.5                       | 75                         | 100                        | 100                        | 100                        | 100                        |  |
| 6              | 16p11.2 df/+ | 3                               | 3                            | 50                         | 87.5                       | 100                        | 100                        | 100                        | 100                        |  |
| 7              | 16p11.2 df/+ | 6                               | 4                            | 75                         | 87.5                       | 62.5                       | 100                        | 100                        | 100                        |  |
| 8              | 16p11.2 df/+ | 3                               | 3                            | 62.5                       | 75                         | 100                        | 100                        | 87.5                       | 100                        |  |
| 9              | 16p11.2 df/+ | 2                               | 4                            | 25                         | 50                         | 87.5                       | 75                         | 87.5                       | 100                        |  |
| 10             | 16p11.2 df/+ | 4                               | 4                            | 87.5                       | 87.5                       | 100                        | 100                        | 100                        | 100                        |  |
| 11             | 16p11.2 df/+ | 3                               | 3                            | 62.5                       | 87.5                       | 100                        | 100                        | 87.5                       | 100                        |  |
| 12             | 16p11.2 df/+ | 3                               | 3                            | 37.5                       | 100                        | 100                        | 100                        | 100                        | 87.5                       |  |
| 13             | 16p11.2 df/+ | 3                               | 4                            | 37.5                       | 100                        | 100                        | 100                        | 100                        | 100                        |  |
| 14             | 16p11.2 df/+ | 2                               | 2                            | 62.5                       | 87.5                       | 100                        | 87.5                       | 100                        | 100                        |  |
| 15             | 16p11.2 df/+ | 2                               | 3                            | 37.5                       | 87.5                       | 100                        | 100                        | 100                        | 100                        |  |
| 16             | 16p11.2 df/+ | 2                               |                              | 62.5                       | 100                        | 100                        | 100                        | 100                        | 100                        |  |
| 1              | Cntnap2 WT   | 3                               | 3                            | 25                         | 50                         | 87.5                       | 100                        | 100                        | 100                        |  |
| 2              | Cntnap2 WT   | 3                               | 3                            | 25                         | 87.5                       | 100                        | 100                        | 100                        | 100                        |  |
| 3              | Cntnap2 WT   | 2                               | 3                            | 0                          | 75                         | 100                        | 100                        | 100                        | 100                        |  |
| 4              | Cntnap2 WT   | 5                               | 3                            | 75                         | 100                        | 87.5                       | 100                        | 100                        | 100                        |  |
| 5              | Cntnap2 WT   | 3                               | 3                            | 37.5                       | 100                        | 75                         | 100                        | 100                        | 100                        |  |
| 6              | Cntnap2 WT   | 5                               | 2                            | 37.5                       | 100                        | 100                        | 100                        | 100                        | 100                        |  |
| 7              | Cntnap2 WT   | 5                               | 2                            | 0                          | 12.5                       | 12.5                       | 25                         | 87.5                       | 87.5                       |  |
| 8              | Cntnap2 WT   | 3                               | 3                            | 12.5                       | 62.5                       | 87.5                       | 100                        | 100                        | 100                        |  |
| 9              | Cntnap2 WT   | 2                               | 3                            | 50                         | 100                        | 100                        | 100                        | 100                        | 100                        |  |
| 10             | Cntnap2 WT   | 3                               | 4                            | 0                          | 25                         | 12.5                       | 75                         | 87.5                       | 100                        |  |
| 11             | Cntnap2 WT   | 4                               | 3                            |                            |                            |                            |                            |                            |                            |  |
| 12             | Cntnap2 WT   | 5                               | 3                            | 75                         | 87.5                       | 100                        | 100                        | 100                        | 100                        |  |
| 13             | Cntnap2 WT   | 4                               | 3                            | 25                         | 75                         | 87.5                       | 100                        | 100                        | 100                        |  |
| 1              | Cntnap2 -/-  | 3                               | 3                            | 25                         | 100                        | 100                        | 100                        | 100                        | 100                        |  |
| 2              | Cntnap2 -/-  | 3                               | 3                            | 0                          | 0                          | 12.5                       | 0                          | 12.5                       |                            |  |
| 3              | Cntnap2 -/-  | 3                               | 3                            | 62.5                       | 100                        | 87.5                       | 100                        | 100                        | 100                        |  |
| 4              | Cntnap2 -/-  | 3                               | 3                            | 62.5                       | 87.5                       | 100                        | 100                        | 100                        | 100                        |  |
| 5              | Cntnap2 -/-  | 3                               | 3                            | 50                         | 100                        | 100                        | 100                        | 100                        | 100                        |  |
| 6              | Cntnap2 -/-  | 3                               | 3                            | 25                         | 100                        | 100                        | 100                        | 100                        | 100                        |  |
| 7              | Cntnap2 -/-  | 2                               | 3                            | 62.5                       | 87.5                       | 100                        | 100                        | 100                        | 100                        |  |
| 8              | Cntnap2 -/-  | 3                               | 3                            | 62.5                       | 100                        | 100                        | 100                        | 100                        | 100                        |  |
| 9              | Cntnap2 -/-  | 2                               | 3                            | 12.5                       | 100                        | 100                        | 100                        | 100                        | 100                        |  |
| 10             | Cntnap2 -/-  | 2                               | 2                            | 25                         | 62.5                       | 100                        | 100                        | 100                        | 100                        |  |
| 11             | Cntnap2 -/-  | 3                               | 4                            | 25                         | 87.5                       | 100                        | 100                        | 100                        | 100                        |  |
| 12             | Cntnap2 -/-  | 3                               | 3                            | 12.5                       | 62.5                       | 100                        | 100                        | 100                        | 100                        |  |
| 13             | Cntnap2 -/-  | 2                               | 2                            | 25                         | 62.5                       | 100                        | 87.5                       | 100                        | 100                        |  |
