# Supplementary material for: Comprehensive Analysis of the 16p11.2 Deletion and Null Cntnap2 Mouse Models of Autism Spectrum Disorder
Source: PubMed Central journal article supplement (PMC4537259; doi:10.1371/journal.pone.0134572), 2015-08-14
Supplement: pone.0134572.s049.pdf [file pone.0134572.s049.pdf]

| Startle/PPI    |              |         |         |         |         |
|----------------|--------------|---------|---------|---------|---------|
| Number of mice | Genotype     | Startle | PPI     |         |         |
|                |              |         | PP74 dB | PP78 dB | PP82 dB |
| 1              | 16p11.2 WT   | 359.56  | 39.12   | 49.83   | 48.55   |
| 2              | 16p11.2 WT   | 788     | 59.58   | 62.87   | 69.15   |
| 3              | 16p11.2 WT   | 1291.9  | 39.61   | 51.66   | 67.07   |
| 4              | 16p11.2 WT   | 123.6   | 13.34   | 35.48   | 54.37   |
| 5              | 16p11.2 WT   | 89.3    | 17.25   | 32.06   | 44.01   |
| 6              | 16p11.2 WT   | 929.1   | 16.5    | 21.74   | 39.69   |
| 7              | 16p11.2 WT   | 871.4   | 6.53    | 14.82   | 32.76   |
| 8              | 16p11.2 WT   | 293.1   | 43.16   | 49.57   | 46.86   |
| 9              | 16p11.2 WT   | 631.6   | 37.02   | 47.37   | 50.24   |
| 10             | 16p11.2 WT   | 648.2   | 20.04   | 38.35   | 56.77   |
| 11             | 16p11.2 WT   | 916.5   | 61.88   | 68.01   | 73.17   |
| 12             | 16p11.2 WT   | 912.2   | 15.73   | 29.32   | 28.02   |
| 13             | 16p11.2 WT   | 1125.8  | 17.25   | 36.38   | 46.31   |
| 14             | 16p11.2 WT   | 76.11   | -5.51   | 19.85   | 18.76   |
| 15             | 16p11.2 WT   | 916.9   | 27.72   | 43.51   | 63.08   |
| 16             | 16p11.2 WT   | 93.75   | 12.66   | 28.18   | -38.67  |
| 1              | 16p11.2 df/+ | 420.7   | 20.85   | 45.85   | 44.24   |
| 2              | 16p11.2 df/+ | 517.9   | 37.38   | 56.34   | 65.38   |
| 3              | 16p11.2 df/+ | 426     | -1.76   | 6.92    | 44.37   |
| 4              | 16p11.2 df/+ | 257.8   | 45.89   | 44.57   | 65.63   |
| 5              | 16p11.2 df/+ | 724.22  | 26.06   | 36.84   | 44.49   |
| 6              | 16p11.2 df/+ | 154.4   | 36.99   | 42.93   | 51.68   |
| 7              | 16p11.2 df/+ | 84.56   | 4.21    | 6.58    | 30.23   |
| 8              | 16p11.2 df/+ | 822.9   | 40.24   | 67.82   | 72.15   |
| 9              | 16p11.2 df/+ | 550.6   | 18.27   | 24.36   | 38.88   |
| 10             | 16p11.2 df/+ | 521.7   | 19.7    | 29.9    | 37.51   |
| 11             | 16p11.2 df/+ | 764.8   | 9.73    | 10.05   | 31.04   |
| 12             | 16p11.2 df/+ | 861.3   | 2.84    | 14.34   | 29.69   |
| 13             | 16p11.2 df/+ | 457.89  | 30.68   | 45.62   | 57.83   |
| 14             | 16p11.2 df/+ | 504.4   | 23.35   | 40.19   | 33.82   |
| 15             | 16p11.2 df/+ | 290     | 25.79   | 65.37   | 79.91   |
| 16             | 16p11.2 df/+ | 136.3   | 19.4    | 49.69   | 55      |
| 1              | Cntnap2 WT   | 620     | 9.79    | 29.37   | 24.85   |
| 2              | Cntnap2 WT   | 585.4   | -22     | 6.95    | -3.01   |
| 3              | Cntnap2 WT   | 445.7   | 7.54    | 21.07   | 21.97   |
| 4              | Cntnap2 WT   | 1226.1  | 30.23   | 32.8    | 35.97   |
| 5              | Cntnap2 WT   | 458.9   | 26.65   | 41.47   | 47.85   |
| 6              | Cntnap2 WT   | 550.8   | -6.25   | 14.6    | 45.72   |
| 7              | Cntnap2 WT   | 581     | -2.48   | 9.4     | 29.68   |
| 8              | Cntnap2 WT   | 863.5   | 26.5    | 25.33   | 32.74   |
| 9              | Cntnap2 WT   | 945.8   | 16.67   | 26      | 20.01   |
| 10             | Cntnap2 WT   | 909.6   | -0.87   | -3.16   | 13.87   |
| 11             | Cntnap2 WT   | 984.1   | 18.68   | 20.42   | 29.26   |
| 12             | Cntnap2 WT   | 767.3   | -8.73   | -9.46   | -7.87   |
| 13             | Cntnap2 WT   | 446.8   | 29.48   | 51.66   | 64.21   |
| 14             | Cntnap2 WT   | 589.6   | 13.25   | 21.79   | 52.7    |
| 15             | Cntnap2 WT   | 853.4   | 5.18    | 13.59   | 18.35   |
| 16             | Cntnap2 WT   | 750.9   | 25.89   | 44.57   | 55.41   |
| 1              | Cntnap2 -/-  | 749.7   | 29.89   | 49.54   | 55.37   |
| 2              | Cntnap2 -/-  | 539.44  | -23.28  | -1.88   | 9.35    |
| 3              | Cntnap2 -/-  | 692.2   | 17.06   | 27.3    | 39.25   |
| 4              | Cntnap2 -/-  | 521.8   | 28.13   | 50.65   | 46.88   |
| 5              | Cntnap2 -/-  | 779.7   | 7.13    | 35.13   | 34.64   |
| 6              | Cntnap2 -/-  | 548.9   | 20.42   | 38.35   | 38.4    |
| 7              | Cntnap2 -/-  | 642.2   | 55.62   | 65.06   | 67.94   |
| 8              | Cntnap2 -/-  | 565.9   | 23.13   | 31.74   | 36.19   |
| 9              | Cntnap2 -/-  | 728.4   | 44.84   | 47.78   | 47.02   |
| 10             | Cntnap2 -/-  | 832.4   | 38.42   | 53.94   | 63.74   |
| 11             | Cntnap2 -/-  | 616.8   | 8.51    | 21.92   | 38.94   |
| 12             | Cntnap2 -/-  | 959.6   | 15.93   | 16.42   | 48.11   |
| 13             | Cntnap2 -/-  | 628     | 37.42   | 36.86   | 53.03   |
| 14             | Cntnap2 -/-  | 774.2   | 31.9    | 37.01   | 57.03   |
| 15             | Cntnap2 -/-  | 914.2   | 18.92   | 18.96   | 37.17   |
| 16             | Cntnap2 -/-  | 651.9   | 38.84   | 44.56   | 40.05   |
