# Supplementary material for: Comprehensive Analysis of the 16p11.2 Deletion and Null Cntnap2 Mouse Models of Autism Spectrum Disorder
Source: PubMed Central journal article supplement (PMC4537259; doi:10.1371/journal.pone.0134572), 2015-08-14
Supplement: pone.0134572.s050.pdf [file pone.0134572.s050.pdf]

| Marble Burying |              |                |                         |
|----------------|--------------|----------------|-------------------------|
| Number of mice | Genotype     | Marbles Buried | Total Distance Traveled |
| 1              | 16p11.2 WT   | 16             | 10248.6                 |
| 2              | 16p11.2 WT   | 12             | 9348.4                  |
| 3              | 16p11.2 WT   | 19             | 6824.3                  |
| 4              | 16p11.2 WT   | 20             | 8930.4                  |
| 5              | 16p11.2 WT   | 17             | 5616.1                  |
| 6              | 16p11.2 WT   | 17             | 4863.6                  |
| 7              | 16p11.2 WT   | 15             | 7870.6                  |
| 8              | 16p11.2 WT   | 15             | 8624.1                  |
| 9              | 16p11.2 WT   | 18             | 8254.6                  |
| 10             | 16p11.2 WT   | 4              | 4388.9                  |
| 11             | 16p11.2 WT   | 2              | 5412.0                  |
| 12             | 16p11.2 WT   | 17             | 6799.7                  |
| 13             | 16p11.2 WT   | 9              | 5910.8                  |
| 14             | 16p11.2 WT   | 13             | 6529.7                  |
| 15             | 16p11.2 WT   | 14             | 6658.9                  |
| 16             | 16p11.2 WT   | 18             | 8940.1                  |
| 1              | 16p11.2 df/+ | 18             |                         |
| 2              | 16p11.2 df/+ | 1              | 5884.0                  |
| 3              | 16p11.2 df/+ | 18             | 12426.2                 |
| 4              | 16p11.2 df/+ | 17             | 7607.5                  |
| 5              | 16p11.2 df/+ | 18             | 9940.1                  |
| 6              | 16p11.2 df/+ | 17             | 8854.3                  |
| 7              | 16p11.2 df/+ | 15             | 7777.0                  |
| 8              | 16p11.2 df/+ | 20             | 8046.2                  |
| 9              | 16p11.2 df/+ | 16             | 7558.0                  |
| 10             | 16p11.2 df/+ | 15             | 9278.9                  |
| 11             | 16p11.2 df/+ | 20             | 13913.7                 |
| 12             | 16p11.2 df/+ | 18             | 9680.4                  |
| 13             | 16p11.2 df/+ | 0              | 6867.2                  |
| 14             | 16p11.2 df/+ | 12             | 7525.4                  |
| 15             | 16p11.2 df/+ | 17             | 9662.6                  |
| 16             | 16p11.2 df/+ | 7              | 6521.9                  |
| 1              | Cntnap2 WT   | 13             | 8892.4                  |
| 2              | Cntnap2 WT   | 10             | 5608.9                  |
| 3              | Cntnap2 WT   | 18             | 9197.2                  |
| 4              | Cntnap2 WT   | 15             | 7030.4                  |
| 5              | Cntnap2 WT   | 18             | 6048.6                  |
| 6              | Cntnap2 WT   | 16             | 6660.7                  |
| 7              | Cntnap2 WT   | 19             | 8292.3                  |
| 8              | Cntnap2 WT   | 17             | 6850.2                  |
| 9              | Cntnap2 WT   | 17             | 7817.3                  |
| 10             | Cntnap2 WT   | 16             | 7260.8                  |
| 11             | Cntnap2 WT   | 18             | 9575.5                  |
| 12             | Cntnap2 WT   | 19             | 7207.8                  |
| 13             | Cntnap2 WT   | 14             | 10876.4                 |
| 14             | Cntnap2 WT   | 14             | 7883.0                  |
| 15             | Cntnap2 WT   | 9              | 8458.1                  |
| 16             | Cntnap2 WT   | 3              | 5862.5                  |
| 1              | Cntnap2 -/-  | 15             | 5672.5                  |
| 2              | Cntnap2 -/-  | 10             | 8654.2                  |
| 3              | Cntnap2 -/-  | 16             | 7387.4                  |
| 4              | Cntnap2 -/-  | 15             | 8125.1                  |
| 5              | Cntnap2 -/-  | 13             | 8128.2                  |
| 6              | Cntnap2 -/-  | 15             | 8172.8                  |
| 7              | Cntnap2 -/-  | 7              | 6006.5                  |
| 8              | Cntnap2 -/-  | 16             | 5419.6                  |
| 9              | Cntnap2 -/-  | 11             | 9201.1                  |
| 10             | Cntnap2 -/-  | 3              |                         |
| 11             | Cntnap2 -/-  | 16             | 7412.5                  |
| 12             | Cntnap2 -/-  | 15             | 8954.9                  |
| 13             | Cntnap2 -/-  | 15             | 7646.3                  |
| 14             | Cntnap2 -/-  | 17             | 9062.7                  |
| 15             | Cntnap2 -/-  | 1              | 9749.6                  |
| 16             | Cntnap2 -/-  | 4              | 7901.7                  |
